# Supplementary material for: An Ethical Assessment Tool (ETHAS) to Evaluate the Application of Assisted Reproductive Technologies in Mammals’ Conservation: The Case of the Northern White Rhinoceros (Ceratotherium simum cottoni)
Source: MDPI journal article supplement (doi:10.3390/ani11020312), 2021-01-26
Supplement: s1 [file s1]

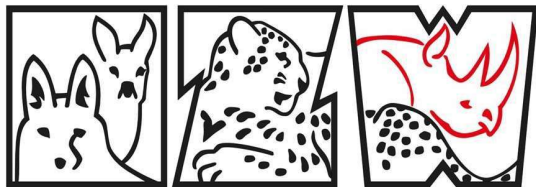

Leibniz Institute for Zoo  
& Wildlife Research Berlin

**BioRescue**

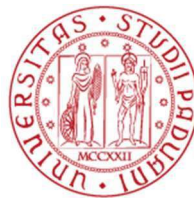

UNIVERSITÀ  
DEGLI STUDI  
DI PADOVA

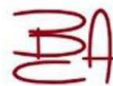

DEPARTMENT OF COMPARATIVE BIOMEDICINE  
AND FOOD SCIENCE

---

# IVF Laboratory Procedures **ETHICAL EVALUATION SHEET**

---

***BioRescue* Ethical Team**

Ethics Laboratory for Conservation,  
Veterinary Medicine and Animal Welfare

## IVF Laboratory Procedures Ethical Evaluation Sheet

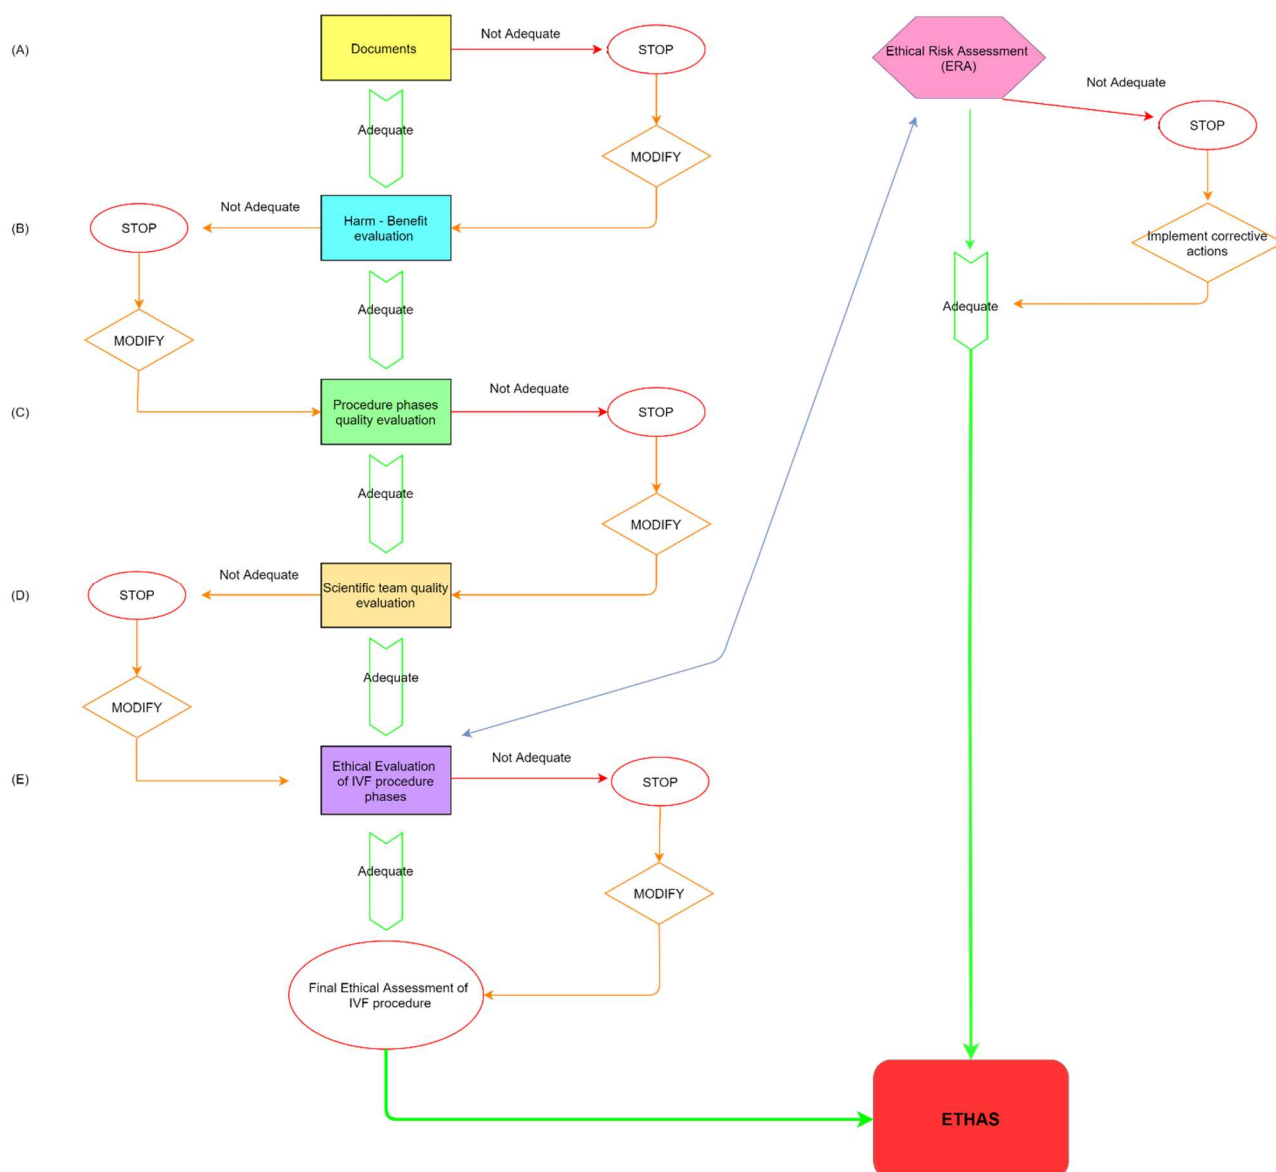

Figure 1: Flow chart for IVF phases (from A to E).

## IVF Laboratory Procedures Ethical Evaluation Sheet

| <b>A</b>                   |                                                                                                                                                                                                                                                                                                                                                                                                                                                                                                                                                                                                                                                                                                                                                                                                                  |     |    |                                                     | <b>DOCUMENTS</b> |  |  |  |  |
|----------------------------|------------------------------------------------------------------------------------------------------------------------------------------------------------------------------------------------------------------------------------------------------------------------------------------------------------------------------------------------------------------------------------------------------------------------------------------------------------------------------------------------------------------------------------------------------------------------------------------------------------------------------------------------------------------------------------------------------------------------------------------------------------------------------------------------------------------|-----|----|-----------------------------------------------------|------------------|--|--|--|--|
| <i>Details when needed</i> |                                                                                                                                                                                                                                                                                                                                                                                                                                                                                                                                                                                                                                                                                                                                                                                                                  |     |    |                                                     |                  |  |  |  |  |
| 1.                         | <p>Has the IVF protocol been planned in compliance with the Directive 2010/63/EU?</p>                                                                                                                                                                                                                                                                                                                                                                                                                                                                                                                                                                                                                                                                                                                            | YES | NO | <p>.....</p> <p>.....</p> <p>.....</p> <p>.....</p> |                  |  |  |  |  |
| 2.                         | <p>When a non-EU country is involved, do the research-related activities, undertaken in that country, raise potential ethics issues?</p> <p><i>Horizon 2020: Being outside the reach of European laws and standards, such procedure can raise specific ethical issues (particularly in developing countries): “exploitation of participants, exploitation of local resources, risks to workers &amp; staff”.</i></p> <p>If yes, specify</p> <p>.....</p> <p>.....</p> <p>.....</p>                                                                                                                                                                                                                                                                                                                               | YES | NO | <p>.....</p> <p>.....</p> <p>.....</p> <p>.....</p> |                  |  |  |  |  |
| 3.                         | <p>If animal specimens of low and/or lower-middle-income countries are involved, have documents showing compliance with the following normative been submitted to the competent authority:</p> <p>a) Nagoya Protocol on access and benefit-sharing?</p> <p>b) EU Regulation No 511/2014 (on compliance of Nagoya Protocol)?</p> <p><i>Horizon 2020: “Resources from a non-EU country — Any use of local resources (especially animal and/or human tissue samples, genetic material, live animals, human remains, materials of historical value, endangered fauna or flora samples, fossils) must show respect for cultural traditions and share benefits (i.e. also benefit local participants and their communities, involve local workers – as equal partners – and respond to local worker’s needs).”</i></p> | YES | NO | <p>.....</p> <p>.....</p> <p>.....</p> <p>.....</p> |                  |  |  |  |  |

## IVF Laboratory Procedures Ethical Evaluation Sheet

|    |                                                                                                                                                                                                                                                                                                                                                                                                                                                                                                               |     |    |                                                     |
|----|---------------------------------------------------------------------------------------------------------------------------------------------------------------------------------------------------------------------------------------------------------------------------------------------------------------------------------------------------------------------------------------------------------------------------------------------------------------------------------------------------------------|-----|----|-----------------------------------------------------|
| 4. | <p>If the IVF procedures are part of a project that involves low and/or lower-middle-income countries, are benefit-sharing measures been planned?</p> <p>Please, give details on:</p> <p>a) Benefit sharing measures.</p> <p>b) Responsiveness to local population needs.</p> <p>a) .....</p> <p>b) .....</p>                                                                                                                                                                                                 | YES | NO | <p>.....</p> <p>.....</p> <p>.....</p> <p>.....</p> |
| 5. | <p>If needed, have export licenses, to import biomaterial from non-EU countries into the EU, been obtained?</p> <p><i>Horizon 2020 “Import/export of material — If genetic resources are transferred across borders, it may be mandatory under the law of the provider country to obtain an authorisation for the transfer. In addition, you must use an agreement which describes the conditions for the export and the terms of utilisation and, if applicable, relevant benefit-sharing measures.”</i></p> | YES | NO | <p>.....</p> <p>.....</p> <p>.....</p> <p>.....</p> |
| 6. | <p>Do the laboratories involved have an ISO accreditation?</p> <p>If yes, give details.</p> <p>.....</p>                                                                                                                                                                                                                                                                                                                                                                                                      | YES | NO | <p>.....</p> <p>.....</p> <p>.....</p> <p>.....</p> |
| 7. | <p>Has an ethical approval been obtained?</p> <p>If yes, give details.</p> <p>.....</p>                                                                                                                                                                                                                                                                                                                                                                                                                       | YES | NO | <p>.....</p> <p>.....</p> <p>.....</p> <p>.....</p> |
| 8. | <p>Have the licenses to the practice of all the staff involved in the IVF procedures been submitted?</p>                                                                                                                                                                                                                                                                                                                                                                                                      | YES | NO | <p>.....</p> <p>.....</p> <p>.....</p> <p>.....</p> |
| 9. | <p>Have certificates of good standing been submitted?</p> <p><i>(e.g. a certification that no measures of disciplinary action of professional or administrative nature had been taken for all the staff involved in the procedure)</i></p>                                                                                                                                                                                                                                                                    | YES | NO | <p>.....</p> <p>.....</p> <p>.....</p> <p>.....</p> |

## IVF Laboratory Procedures Ethical Evaluation Sheet

| <b>B HARM - BENEFIT EVALUATION</b> |                                                                                                                                                                                                                                                                                                                                                                                                                                                                      |     |    |                                                                                                                                                                                                                                                                                                                                                                 |
|------------------------------------|----------------------------------------------------------------------------------------------------------------------------------------------------------------------------------------------------------------------------------------------------------------------------------------------------------------------------------------------------------------------------------------------------------------------------------------------------------------------|-----|----|-----------------------------------------------------------------------------------------------------------------------------------------------------------------------------------------------------------------------------------------------------------------------------------------------------------------------------------------------------------------|
| <b>B1 Benefit evaluation</b>       |                                                                                                                                                                                                                                                                                                                                                                                                                                                                      |     |    |                                                                                                                                                                                                                                                                                                                                                                 |
| <i>Details when needed</i>         |                                                                                                                                                                                                                                                                                                                                                                                                                                                                      |     |    |                                                                                                                                                                                                                                                                                                                                                                 |
| 10.                                | Are the IVF procedures part of a novel wildlife conservation strategy?                                                                                                                                                                                                                                                                                                                                                                                               | YES | NO | <div style="border-bottom: 1px dotted black; height: 1.2em; margin-bottom: 2px;"></div> <div style="border-bottom: 1px dotted black; height: 1.2em; margin-bottom: 2px;"></div> <div style="border-bottom: 1px dotted black; height: 1.2em; margin-bottom: 2px;"></div> <div style="border-bottom: 1px dotted black; height: 1.2em; margin-bottom: 2px;"></div> |
| 11.                                | Will the application of the IVF procedures improve efforts and the advancement of reproductive scientific knowledge for developing new conservation strategies?                                                                                                                                                                                                                                                                                                      | YES | NO | <div style="border-bottom: 1px dotted black; height: 1.2em; margin-bottom: 2px;"></div> <div style="border-bottom: 1px dotted black; height: 1.2em; margin-bottom: 2px;"></div> <div style="border-bottom: 1px dotted black; height: 1.2em; margin-bottom: 2px;"></div> <div style="border-bottom: 1px dotted black; height: 1.2em; margin-bottom: 2px;"></div> |
| 12.                                | Could the effects of the IVF procedure, as part of a novel conservation strategy, have a positive impact on the natural habitat in the future?                                                                                                                                                                                                                                                                                                                       | YES | NO | <div style="border-bottom: 1px dotted black; height: 1.2em; margin-bottom: 2px;"></div> <div style="border-bottom: 1px dotted black; height: 1.2em; margin-bottom: 2px;"></div> <div style="border-bottom: 1px dotted black; height: 1.2em; margin-bottom: 2px;"></div> <div style="border-bottom: 1px dotted black; height: 1.2em; margin-bottom: 2px;"></div> |
| 13.                                | Will the scientific improvements obtained from the IVF procedures impact positively on other scientific fields?                                                                                                                                                                                                                                                                                                                                                      | YES | NO | <div style="border-bottom: 1px dotted black; height: 1.2em; margin-bottom: 2px;"></div> <div style="border-bottom: 1px dotted black; height: 1.2em; margin-bottom: 2px;"></div> <div style="border-bottom: 1px dotted black; height: 1.2em; margin-bottom: 2px;"></div> <div style="border-bottom: 1px dotted black; height: 1.2em; margin-bottom: 2px;"></div> |
| 14.                                | Will the application of the IVF procedures improve the professional training of the laboratory personnel?<br><br>If yes, please give details<br><div style="border-bottom: 1px dotted black; height: 1.2em; margin-bottom: 2px;"></div> <div style="border-bottom: 1px dotted black; height: 1.2em; margin-bottom: 2px;"></div> <div style="border-bottom: 1px dotted black; height: 1.2em; margin-bottom: 2px;"></div>                                              | YES | NO | <div style="border-bottom: 1px dotted black; height: 1.2em; margin-bottom: 2px;"></div> <div style="border-bottom: 1px dotted black; height: 1.2em; margin-bottom: 2px;"></div> <div style="border-bottom: 1px dotted black; height: 1.2em; margin-bottom: 2px;"></div> <div style="border-bottom: 1px dotted black; height: 1.2em; margin-bottom: 2px;"></div> |
| 15.                                | Is the scientific knowledge achievable from IVF procedure optimization/application relevant to the assisted reproductive technology (ART) for mammals?<br><br>If yes, please give details<br><div style="border-bottom: 1px dotted black; height: 1.2em; margin-bottom: 2px;"></div> <div style="border-bottom: 1px dotted black; height: 1.2em; margin-bottom: 2px;"></div> <div style="border-bottom: 1px dotted black; height: 1.2em; margin-bottom: 2px;"></div> | YES | NO | <div style="border-bottom: 1px dotted black; height: 1.2em; margin-bottom: 2px;"></div> <div style="border-bottom: 1px dotted black; height: 1.2em; margin-bottom: 2px;"></div> <div style="border-bottom: 1px dotted black; height: 1.2em; margin-bottom: 2px;"></div> <div style="border-bottom: 1px dotted black; height: 1.2em; margin-bottom: 2px;"></div> |

## IVF Laboratory Procedures Ethical Evaluation Sheet

|                            |                                                                                                                                                                                                                                                                                   |                                                               |                                                              |                                                     |
|----------------------------|-----------------------------------------------------------------------------------------------------------------------------------------------------------------------------------------------------------------------------------------------------------------------------------|---------------------------------------------------------------|--------------------------------------------------------------|-----------------------------------------------------|
| 16.                        | <p>Could the IVF procedures or part of them have positive side effects on the species involved?</p> <p>If yes, which ones?</p> <p>.....</p> <p>.....</p> <p>.....</p>                                                                                                             | YES                                                           | NO                                                           | <p>.....</p> <p>.....</p> <p>.....</p> <p>.....</p> |
| <b>B2 Harm evaluation</b>  |                                                                                                                                                                                                                                                                                   |                                                               |                                                              |                                                     |
| <i>Details when needed</i> |                                                                                                                                                                                                                                                                                   |                                                               |                                                              |                                                     |
| 17.                        | <p>Could these IVF procedures or part of them have adverse side effects on the health of the species involved?</p> <p>If yes, which ones?</p> <p>.....</p> <p>.....</p> <p>.....</p>                                                                                              | YES                                                           | NO                                                           | <p>.....</p> <p>.....</p> <p>.....</p> <p>.....</p> |
| 18.                        | <p>Have the possible adverse effects on the specimens, during the following steps, been considered?</p> <p>a) Oocytes maturation</p> <p>b) Sperm recovery</p> <p>c) Gametes preparation for IVF</p> <p>d) Embryos developement</p> <p>e) Specimens long-term cryopreservation</p> | <div style="border: 1px solid black; padding: 2px;">YES</div> | <div style="border: 1px solid black; padding: 2px;">NO</div> | <p>.....</p> <p>.....</p> <p>.....</p> <p>.....</p> |

## IVF Laboratory Procedures Ethical Evaluation Sheet

|     |                                                                                                                                                                                                                                                         |     |    |                                                     |
|-----|---------------------------------------------------------------------------------------------------------------------------------------------------------------------------------------------------------------------------------------------------------|-----|----|-----------------------------------------------------|
|     | <p>If yes, give details</p> <p>a) .....</p> <p>b) .....</p> <p>c) .....</p> <p>d) .....</p> <p>e) .....</p>                                                                                                                                             |     |    |                                                     |
| 19. | <p>Have the possible negative effects (public opinions, scientific opinions, etc.), that may occur to the biological specimens of the northern white rhinoceros during the IVF procedures, been considered and discussed with the project partners?</p> | YES | NO | <p>.....</p> <p>.....</p> <p>.....</p> <p>.....</p> |
| 20. | <p>Is there any other concern about the harm evaluation of the IVF procedure you would like to underline?</p> <p>If yes, give details</p> <p>.....</p> <p>.....</p> <p>.....</p>                                                                        | YES | NO | <p>.....</p> <p>.....</p> <p>.....</p> <p>.....</p> |

## IVF Laboratory Procedures Ethical Evaluation Sheet

| C PROCEDURE PHASES QUALITY EVALUATION |                                                                                                                                                                                                             |     |    |                                                     |
|---------------------------------------|-------------------------------------------------------------------------------------------------------------------------------------------------------------------------------------------------------------|-----|----|-----------------------------------------------------|
| C1 Pre-screening considerations       |                                                                                                                                                                                                             |     |    |                                                     |
| <i>Details when needed</i>            |                                                                                                                                                                                                             |     |    |                                                     |
| 21.                                   | <p>Has the quality of the innovative IVF procedure or the equipment been already tested in other related studies?</p> <p>If yes, give details</p> <p>.....</p> <p>.....</p> <p>.....</p>                    | YES | NO | <p>.....</p> <p>.....</p> <p>.....</p> <p>.....</p> |
| 22.                                   | <p>Since IVF procedure is commonly used in farm and domestic animals, have the necessary species-specific adaptations being considered?</p>                                                                 | YES | NO | <p>.....</p> <p>.....</p> <p>.....</p> <p>.....</p> |
| 23.                                   | <p>Has the opportunity to modify any step of the IVF protocol ever been considered to improve the procedure for the rhinoceros' specimens?</p>                                                              | YES | NO | <p>.....</p> <p>.....</p> <p>.....</p> <p>.....</p> |
| 24.                                   | <p>Has an IVF procedural timetable for each single phases of the IVF laboratory procedures been drawn up?</p>                                                                                               | YES | NO | <p>.....</p> <p>.....</p> <p>.....</p> <p>.....</p> |
| 25.                                   | <p>Are the project partners committed to eventually publishing also critical events so that they could be avoided in future projects?</p> <p>If no, explain why.</p> <p>.....</p> <p>.....</p> <p>.....</p> | YES | NO | <p>.....</p> <p>.....</p> <p>.....</p> <p>.....</p> |
| 26.                                   | <p>Has it been planned to share and publish relevant data of procedures refinement?</p> <p>If no, explain why.</p> <p>.....</p> <p>.....</p> <p>.....</p>                                                   | YES | NO | <p>.....</p> <p>.....</p> <p>.....</p> <p>.....</p> |

## IVF Laboratory Procedures Ethical Evaluation Sheet

| <b>C2 Procedural steps evaluation</b> |                                                                                                                                                                                                                                                                                                                                         |     |    |                                                                                                                                                                                                                                                                                                                                                                 |
|---------------------------------------|-----------------------------------------------------------------------------------------------------------------------------------------------------------------------------------------------------------------------------------------------------------------------------------------------------------------------------------------|-----|----|-----------------------------------------------------------------------------------------------------------------------------------------------------------------------------------------------------------------------------------------------------------------------------------------------------------------------------------------------------------------|
| <i>Details when needed</i>            |                                                                                                                                                                                                                                                                                                                                         |     |    |                                                                                                                                                                                                                                                                                                                                                                 |
| 27.                                   | Have the sperm collection and recovery protocols been tested and evaluated in other related species?                                                                                                                                                                                                                                    | YES | NO | <div style="border-bottom: 1px dotted black; height: 1.2em; margin-bottom: 2px;"></div> <div style="border-bottom: 1px dotted black; height: 1.2em; margin-bottom: 2px;"></div> <div style="border-bottom: 1px dotted black; height: 1.2em; margin-bottom: 2px;"></div> <div style="border-bottom: 1px dotted black; height: 1.2em; margin-bottom: 2px;"></div> |
| 28.                                   | Has the oocytes maturation protocol been tested and evaluated in other related species?                                                                                                                                                                                                                                                 | YES | NO | <div style="border-bottom: 1px dotted black; height: 1.2em; margin-bottom: 2px;"></div> <div style="border-bottom: 1px dotted black; height: 1.2em; margin-bottom: 2px;"></div> <div style="border-bottom: 1px dotted black; height: 1.2em; margin-bottom: 2px;"></div> <div style="border-bottom: 1px dotted black; height: 1.2em; margin-bottom: 2px;"></div> |
| 29.                                   | Has the oocytes ICSI protocol been tested and evaluated in other related species?                                                                                                                                                                                                                                                       | YES | NO | <div style="border-bottom: 1px dotted black; height: 1.2em; margin-bottom: 2px;"></div> <div style="border-bottom: 1px dotted black; height: 1.2em; margin-bottom: 2px;"></div> <div style="border-bottom: 1px dotted black; height: 1.2em; margin-bottom: 2px;"></div> <div style="border-bottom: 1px dotted black; height: 1.2em; margin-bottom: 2px;"></div> |
| 30.                                   | Have the embryo development protocol been tested and evaluated in other related species?                                                                                                                                                                                                                                                | YES | NO | <div style="border-bottom: 1px dotted black; height: 1.2em; margin-bottom: 2px;"></div> <div style="border-bottom: 1px dotted black; height: 1.2em; margin-bottom: 2px;"></div> <div style="border-bottom: 1px dotted black; height: 1.2em; margin-bottom: 2px;"></div> <div style="border-bottom: 1px dotted black; height: 1.2em; margin-bottom: 2px;"></div> |
| 31.                                   | Has the method used to select the spermatozoa that will be used for the ICSI been optimized in other related species?                                                                                                                                                                                                                   | YES | NO | <div style="border-bottom: 1px dotted black; height: 1.2em; margin-bottom: 2px;"></div> <div style="border-bottom: 1px dotted black; height: 1.2em; margin-bottom: 2px;"></div> <div style="border-bottom: 1px dotted black; height: 1.2em; margin-bottom: 2px;"></div> <div style="border-bottom: 1px dotted black; height: 1.2em; margin-bottom: 2px;"></div> |
| <b>C3 3Rs evaluation</b>              |                                                                                                                                                                                                                                                                                                                                         |     |    |                                                                                                                                                                                                                                                                                                                                                                 |
| <b>Replacement</b>                    |                                                                                                                                                                                                                                                                                                                                         |     |    |                                                                                                                                                                                                                                                                                                                                                                 |
| <i>Details when needed</i>            |                                                                                                                                                                                                                                                                                                                                         |     |    |                                                                                                                                                                                                                                                                                                                                                                 |
| 32.                                   | Have alternative procedural steps or parts of them been considered for the execution of the project?<br><br>If not, why?<br><br>If yes, explain.<br><br><div style="border-bottom: 1px dotted black; height: 1.2em; margin-bottom: 2px;"></div> <div style="border-bottom: 1px dotted black; height: 1.2em; margin-bottom: 2px;"></div> | YES | NO | <div style="border-bottom: 1px dotted black; height: 1.2em; margin-bottom: 2px;"></div> <div style="border-bottom: 1px dotted black; height: 1.2em; margin-bottom: 2px;"></div> <div style="border-bottom: 1px dotted black; height: 1.2em; margin-bottom: 2px;"></div> <div style="border-bottom: 1px dotted black; height: 1.2em; margin-bottom: 2px;"></div> |
| 33.                                   | Has the possibility to change some procedural steps for an incomplete replacement been considered?<br><br>If yes, give some details.<br><br><div style="border-bottom: 1px dotted black; height: 1.2em; margin-bottom: 2px;"></div> <div style="border-bottom: 1px dotted black; height: 1.2em; margin-bottom: 2px;"></div>             | YES | NO | <div style="border-bottom: 1px dotted black; height: 1.2em; margin-bottom: 2px;"></div> <div style="border-bottom: 1px dotted black; height: 1.2em; margin-bottom: 2px;"></div> <div style="border-bottom: 1px dotted black; height: 1.2em; margin-bottom: 2px;"></div> <div style="border-bottom: 1px dotted black; height: 1.2em; margin-bottom: 2px;"></div> |

## IVF Laboratory Procedures Ethical Evaluation Sheet

|                  |                                                                                                                                                                       |     |    |                                  |
|------------------|-----------------------------------------------------------------------------------------------------------------------------------------------------------------------|-----|----|----------------------------------|
| 34.              | Is it possible to replace the medium extracted from other animals with synthetic ones?<br>(e.g. <i>rhinoceros estrum serum</i> , <i>BSA</i> , etc.)                   | YES | NO | .....<br>.....<br>.....<br>..... |
| 35.              | Is it possible to optimize the procedures on other species not endangered?                                                                                            | YES | NO | .....<br>.....<br>.....<br>..... |
| 36.              | Have other cryopreservation methodologies been evaluated for a more efficient sperm long-term stocking?                                                               | YES | NO | .....<br>.....<br>.....<br>..... |
| <b>Reduction</b> |                                                                                                                                                                       |     |    |                                  |
| 37.              | Have IVF procedure phases been optimized so that a minimum number of collected specimens will be used?                                                                | YES | NO | .....<br>.....<br>.....<br>..... |
| 38.              | Will the gametes or embryos be shared with other scientific groups?<br>If yes, give details.<br>If no, give details.<br>.....<br>.....<br>.....                       | YES | NO | .....<br>.....<br>.....<br>..... |
| 39.              | Is it possible to thaw the minimum necessary aliquot of sperm?                                                                                                        | YES | NO | .....<br>.....<br>.....<br>..... |
| 40.              | Could the specimens that cannot be used for the IVF procedure (e.g., surplus of spermatozoa, oocytes and embryos not adequately developed) be used for other studies? | YES | NO | .....<br>.....<br>.....<br>..... |

## IVF Laboratory Procedures Ethical Evaluation Sheet

| <b>Refinement</b> |                                                                                                                                                                                                           |     |    |                                  |
|-------------------|-----------------------------------------------------------------------------------------------------------------------------------------------------------------------------------------------------------|-----|----|----------------------------------|
| 41.               | Have IVF laboratory procedures ever been applied to other animal specimens of other species, so that any possible risk has already been evaluated, analysed and minimized?                                | YES | NO | .....<br>.....<br>.....<br>..... |
| 42.               | Have alternative procedural steps or part of them that might reduce possible cellular stress of the following specimens been considered?                                                                  |     |    | .....<br>.....<br>.....          |
|                   | a) Oocytes                                                                                                                                                                                                | YES | NO | .....                            |
|                   | b) Spermatozoa                                                                                                                                                                                            | YES | NO | .....                            |
|                   | c) Embryos                                                                                                                                                                                                | YES | NO | .....                            |
| 43.               | Have mitigation actions been included in the protocols to reduce the possible adverse effects that the following specimens might encounter? (i.e. chemical and physical parameters control, <i>etc.</i> ) |     |    | .....<br>.....<br>.....          |
|                   | a) Oocytes maturation                                                                                                                                                                                     | YES | NO | .....                            |
|                   | b) Sperm recovery                                                                                                                                                                                         | YES | NO | .....                            |
|                   | c) Gametes preparation for IVF                                                                                                                                                                            | YES | NO | .....                            |
|                   | d) Embryos development                                                                                                                                                                                    | YES | NO | .....                            |
|                   | e) Specimens long-term cryopreservation                                                                                                                                                                   | YES | NO | .....                            |
| 44.               | To avoid cellular stress, during the IVF procedure, have the external variables (chemicals and physical parameters) been kept within adequate parameters?                                                 | YES | NO | .....<br>.....<br>.....<br>..... |
| 45.               | Is it possible to optimize the following procedures?                                                                                                                                                      |     |    | .....<br>.....<br>.....          |
|                   | a) maturation oocyte                                                                                                                                                                                      | YES | NO | .....                            |
|                   | b) sperm recovery                                                                                                                                                                                         | YES | NO | .....                            |

## IVF Laboratory Procedures Ethical Evaluation Sheet

| <b>D SCIENTIFIC TEAM QUALITY EVALUATION</b> |                                                                                                                                                                                                |     |    |                                           |
|---------------------------------------------|------------------------------------------------------------------------------------------------------------------------------------------------------------------------------------------------|-----|----|-------------------------------------------|
| <b>D1 Team and Teamwork</b>                 |                                                                                                                                                                                                |     |    |                                           |
| <i>Details when needed</i>                  |                                                                                                                                                                                                |     |    |                                           |
| 46.                                         | Are the team's economic resources adequate for the following a) and b) situations?<br>a) all the project<br>b) to overcome problematic situations or emergency management in case of necessity | YES | NO | .....<br>.....<br>.....<br>.....<br>..... |
| 47.                                         | Has the team already conducted IVF procedures on animals related to the sub-species involved?                                                                                                  | YES | NO | .....<br>.....<br>.....<br>.....<br>..... |
| 48.                                         | Has the team already taken part in relevant and innovative reproductive procedures?                                                                                                            | YES | NO | .....<br>.....<br>.....<br>.....<br>..... |
| 49.                                         | Has the team already developed innovative methodologies?                                                                                                                                       | YES | NO | .....<br>.....<br>.....<br>.....<br>..... |
| 50.                                         | Is someone deciding the team members for the IVF procedure?<br>If yes, give details.<br>.....<br>.....<br>.....                                                                                | YES | NO | .....<br>.....<br>.....<br>.....<br>..... |
| 51.                                         | Is someone responsible for all the IVF procedure phases?<br>If yes, give details.<br>.....<br>.....<br>.....                                                                                   | YES | NO | .....<br>.....<br>.....<br>.....<br>..... |
| 52.                                         | Do all the staff members have defined roles and clear responsibilities in the IVF procedure?                                                                                                   | YES | NO | .....<br>.....<br>.....<br>.....<br>..... |

## IVF Laboratory Procedures Ethical Evaluation Sheet

|     |                                                                                                                                                                                                     |     |    |                                  |
|-----|-----------------------------------------------------------------------------------------------------------------------------------------------------------------------------------------------------|-----|----|----------------------------------|
| 53. | Are all the staff members involved in the IVF experienced in this procedure?                                                                                                                        | YES | NO | .....<br>.....<br>.....<br>..... |
| 54. | Are all the staff members, involved at any level in the IVF procedure, adequately educated, competent and continuously trained and supervised until they have demonstrated the required competence? | YES | NO | .....<br>.....<br>.....<br>..... |
| 55. | Has a person been designed to monitor the specimen's conservation status during the long-term cryopreservation procedure?                                                                           | YES | NO | .....<br>.....<br>.....<br>..... |
| 56. | Is someone responsible for the following steps been assigned?                                                                                                                                       |     |    | .....<br>.....<br>.....<br>..... |
|     | a) stocking of the biological material                                                                                                                                                              | YES | NO |                                  |
|     | b) transport of the biological material                                                                                                                                                             | YES | NO |                                  |
|     | c) transport of embryos from the IVF laboratory to the embryo transfer place                                                                                                                        | YES | NO |                                  |
| 57. | Is the staff member in charge of the transport of the following specimens trained for biological material transportation?                                                                           |     |    | .....<br>.....<br>.....<br>..... |
|     | a) oocytes                                                                                                                                                                                          | YES | NO |                                  |
|     | b) spermatozoa                                                                                                                                                                                      | YES | NO |                                  |
|     | c) embryos                                                                                                                                                                                          | YES | NO |                                  |

### D2 Equipment

*Details when needed*

|     |                                                                                                            |     |    |                                  |
|-----|------------------------------------------------------------------------------------------------------------|-----|----|----------------------------------|
| 58. | Is the adequate equipment, necessary for the proper conduction of the all IVF procedure phases, available? | YES | NO | .....<br>.....<br>.....<br>..... |
| 59. | Is the equipment adequate for the specimens (gametes and embryos) used for the IVF procedure?              | YES | NO | .....<br>.....<br>.....<br>..... |

## IVF Laboratory Procedures Ethical Evaluation Sheet

|                                     |                                                                                                                                                                  |     |    |                                  |
|-------------------------------------|------------------------------------------------------------------------------------------------------------------------------------------------------------------|-----|----|----------------------------------|
| 60.                                 | Before starting the procedure, has the availability of personal protective equipment (PPE) for all the staff members involved been checked?                      | YES | NO | .....<br>.....<br>.....<br>..... |
| 61.                                 | Has a control checklist been developed to verify if all the equipment needed for the procedure are available and correctly operating and, if needed, sterilized? | YES | NO | .....<br>.....<br>.....<br>..... |
| <b>D3 Laboratories and BioBanks</b> |                                                                                                                                                                  |     |    |                                  |
| <i>Details when needed</i>          |                                                                                                                                                                  |     |    |                                  |
| 62.                                 | Are specimens correctly processed in the BioBank?                                                                                                                | YES | NO | .....<br>.....<br>.....<br>..... |
| 63.                                 | Has a Risk Assessment of all the laboratory activities been performed?                                                                                           | YES | NO | .....<br>.....<br>.....<br>..... |
| 64.                                 | If possible, are specimens divided into aliquots and stored in more than one laboratory?                                                                         | YES | NO | .....<br>.....<br>.....<br>..... |

## IVF Laboratory Procedures Ethical Evaluation Sheet

| <b>E ETHICAL EVALUATION OF IVF-lab PROCEDURE PHASES</b> |                                                                                                                                 |     |    |                                                                                                                                                                                                                                                                                                                                                                 |      |
|---------------------------------------------------------|---------------------------------------------------------------------------------------------------------------------------------|-----|----|-----------------------------------------------------------------------------------------------------------------------------------------------------------------------------------------------------------------------------------------------------------------------------------------------------------------------------------------------------------------|------|
| <i>Details when needed</i>                              |                                                                                                                                 |     |    |                                                                                                                                                                                                                                                                                                                                                                 |      |
| 65.                                                     | Has an IVF-lab Ethical Risk Assessment been planned for each laboratory involved in the procedure?                              | YES | NO | <div style="border-bottom: 1px dotted black; height: 1.2em; margin-bottom: 2px;"></div> <div style="border-bottom: 1px dotted black; height: 1.2em; margin-bottom: 2px;"></div> <div style="border-bottom: 1px dotted black; height: 1.2em; margin-bottom: 2px;"></div> <div style="border-bottom: 1px dotted black; height: 1.2em; margin-bottom: 2px;"></div> |      |
| 66.                                                     | In case of a non-satisfied requirement, emerging from the Ethical Risk Assessment, will risk mitigation actions be implemented? | YES | NO | <div style="border-bottom: 1px dotted black; height: 1.2em; margin-bottom: 2px;"></div> <div style="border-bottom: 1px dotted black; height: 1.2em; margin-bottom: 2px;"></div> <div style="border-bottom: 1px dotted black; height: 1.2em; margin-bottom: 2px;"></div> <div style="border-bottom: 1px dotted black; height: 1.2em; margin-bottom: 2px;"></div> |      |
| 67.                                                     | Does the procedure accomplish with all the International and National Regulations?                                              | YES | NO | <div style="border-bottom: 1px dotted black; height: 1.2em; margin-bottom: 2px;"></div> <div style="border-bottom: 1px dotted black; height: 1.2em; margin-bottom: 2px;"></div> <div style="border-bottom: 1px dotted black; height: 1.2em; margin-bottom: 2px;"></div> <div style="border-bottom: 1px dotted black; height: 1.2em; margin-bottom: 2px;"></div> |      |
| 68.                                                     | Has the staff safety been adequately evaluated with dedicated items in the IVF-lab Ethical Risk Assessment?                     | YES | NO | <div style="border-bottom: 1px dotted black; height: 1.2em; margin-bottom: 2px;"></div> <div style="border-bottom: 1px dotted black; height: 1.2em; margin-bottom: 2px;"></div> <div style="border-bottom: 1px dotted black; height: 1.2em; margin-bottom: 2px;"></div> <div style="border-bottom: 1px dotted black; height: 1.2em; margin-bottom: 2px;"></div> |      |
| 69.                                                     | The benefits deriving from the procedures' application are:                                                                     | Low |    | Medium                                                                                                                                                                                                                                                                                                                                                          | High |
| 70.                                                     | The possibility of the procedures' successful accomplishment is:                                                                | Low |    | Medium                                                                                                                                                                                                                                                                                                                                                          | High |
| 71.                                                     | The possibility of the procedures' achievement in the scheduled planning is:                                                    | Low |    | Medium                                                                                                                                                                                                                                                                                                                                                          | High |
| 72.                                                     | The application of the 3Rs principles in the procedures is:                                                                     | Low |    | Medium                                                                                                                                                                                                                                                                                                                                                          | High |
| 73.                                                     | Is it possible to improve the application of the 3Rs?                                                                           | YES | NO | <div style="border-bottom: 1px dotted black; height: 1.2em; margin-bottom: 2px;"></div> <div style="border-bottom: 1px dotted black; height: 1.2em; margin-bottom: 2px;"></div> <div style="border-bottom: 1px dotted black; height: 1.2em; margin-bottom: 2px;"></div> <div style="border-bottom: 1px dotted black; height: 1.2em; margin-bottom: 2px;"></div> |      |

## IVF Laboratory Procedures Ethical Evaluation Sheet

| FINAL ETHICAL ASSESSMENT OF IVF-lab PROCEDURE                                                                                                                                                                                                                                                                                                                 |            |                         |                   |
|---------------------------------------------------------------------------------------------------------------------------------------------------------------------------------------------------------------------------------------------------------------------------------------------------------------------------------------------------------------|------------|-------------------------|-------------------|
| The final assessment of section A, “DOCUMENTS”, is:<br><br><div style="text-align: right;">_____ / 10</div>                                                                                                                                                                                                                                                   | Acceptable | Partially<br>Acceptable | Not<br>Acceptable |
| The final assessment of section B, “HARM BENEFIT EVALUATION”, is:<br><br><div style="text-align: right;">_____ / 15</div>                                                                                                                                                                                                                                     | Acceptable | Partially<br>Acceptable | Not<br>Acceptable |
| The final assessment of section C, “PROCEDURE PHASES QUALITY EVALUATION”, is:<br><br><div style="text-align: right;">_____ / 32</div>                                                                                                                                                                                                                         | Acceptable | Partially<br>Acceptable | Not<br>Acceptable |
| The final assessment of section D, “SCIENTIFIC TEAM QUALITY EVALUATION”, is:<br><br><div style="text-align: right;">_____ / 24</div>                                                                                                                                                                                                                          | Acceptable | Partially<br>Acceptable | Not<br>Acceptable |
| The final assessment of section E, “ETHICAL EVALUATION OF IVF PROCEDURE PHASES”, is:                                                                                                                                                                                                                                                                          | Acceptable | Partially<br>Acceptable | Not<br>Acceptable |
| <p><b>OVERALL ETHICAL ACCEPTABILITY OF IVF PROCEDURE:</b></p> <p><i>If the Ethical Assessment results for each procedure phase respects the predefined cut-off of IVF procedure is “Acceptable”</i></p> <p><i>If the Ethical Assessment results for each procedure phase does not respect the predefined cut-off of IVF procedure is “Not acceptable”</i></p> | Acceptable | Partially<br>Acceptable | Not<br>Acceptable |

## IVF Laboratory Procedures Ethical Evaluation Sheet

Comments,

Ethical *BioRescue* Team

Filled by

Place, Date

Signature
