# Supplementary material for: An Ethical Assessment Tool (ETHAS) to Evaluate the Application of Assisted Reproductive Technologies in Mammals’ Conservation: The Case of the Northern White Rhinoceros (Ceratotherium simum cottoni)
Source: MDPI journal article supplement (doi:10.3390/ani11020312), 2021-01-26
Supplement: s1 [file s1]

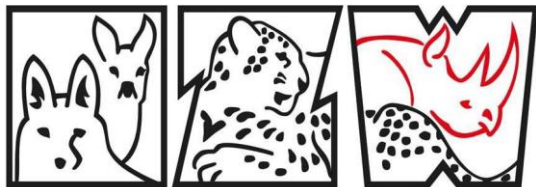

Leibniz Institute for Zoo  
& Wildlife Research Berlin

**BioRescue**

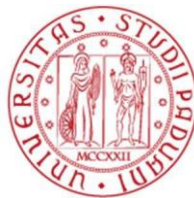

UNIVERSITÀ  
DEGLI STUDI  
DI PADOVA

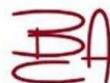

DEPARTMENT OF COMPARATIVE BIOMEDICINE  
AND FOOD SCIENCE

---

# OPU

# ETHICAL EVALUATION SHEET

---

***BioRescue* Ethical Team**

Ethics Laboratory for Conservation,  
Veterinary Medicine and Animal Welfare

## OPU Ethical Evaluation Sheet

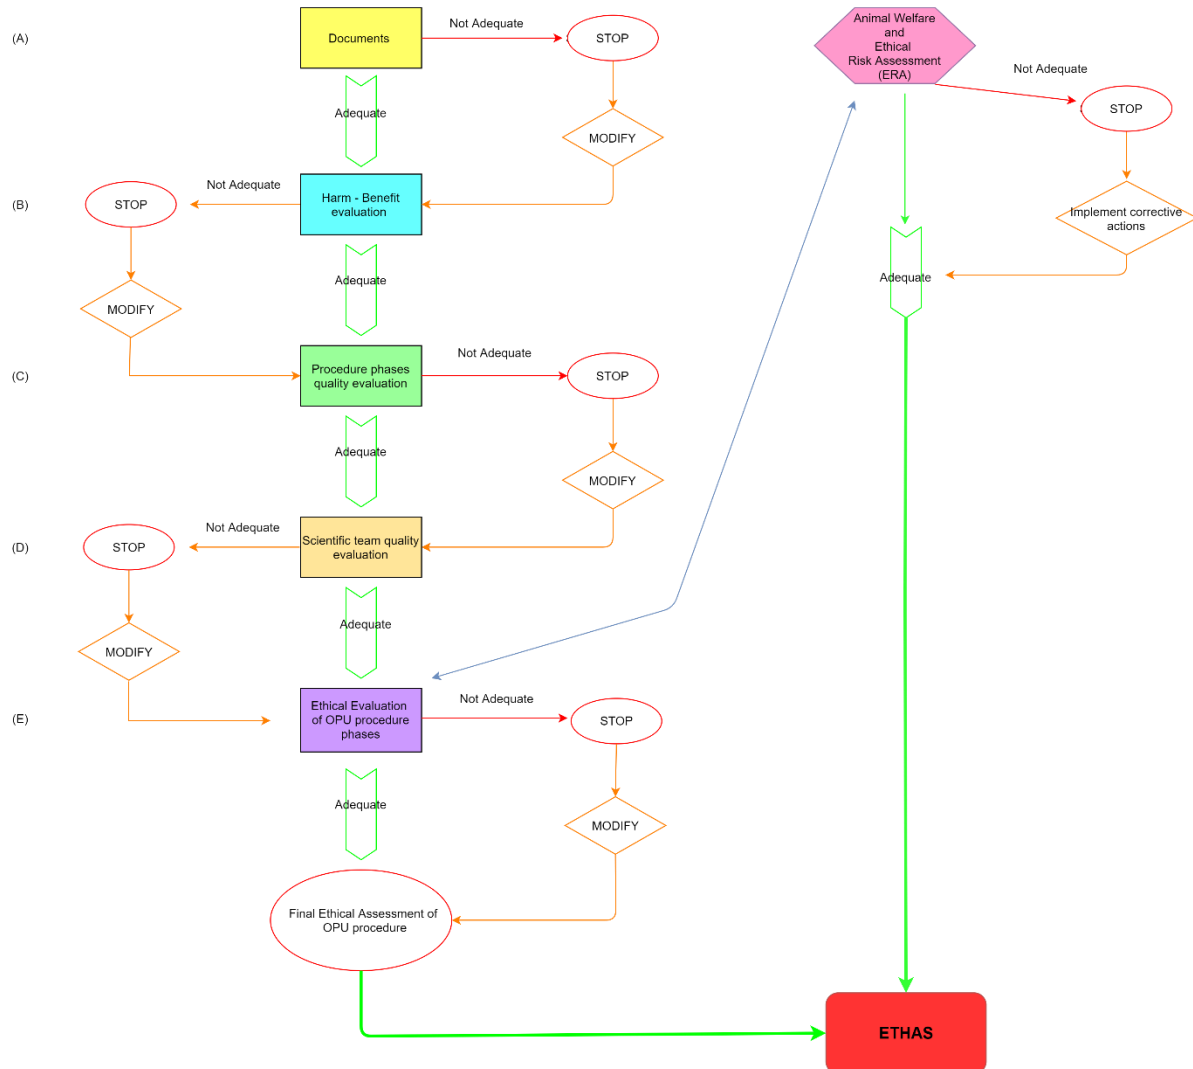

Figure 1: Flow chart of phases from A to E.

## OPU Ethical Evaluation Sheet

| A DOCUMENTS         |                                                                                                                                                                                                                                                                                                                                                                                                                                                                           |     |    |                                  |
|---------------------|---------------------------------------------------------------------------------------------------------------------------------------------------------------------------------------------------------------------------------------------------------------------------------------------------------------------------------------------------------------------------------------------------------------------------------------------------------------------------|-----|----|----------------------------------|
| Details when needed |                                                                                                                                                                                                                                                                                                                                                                                                                                                                           |     |    |                                  |
| 1.                  | Has this OPU protocol been planned in compliance with the Directive 2010/63/EU?                                                                                                                                                                                                                                                                                                                                                                                           | YES | NO | .....<br>.....<br>.....<br>..... |
| 2.                  | Do the following governments support this OPU procedure?                                                                                                                                                                                                                                                                                                                                                                                                                  |     |    | .....<br>.....<br>.....          |
|                     | a) EU government                                                                                                                                                                                                                                                                                                                                                                                                                                                          | YES | NO | .....<br>.....                   |
|                     | b) Non-EU governments                                                                                                                                                                                                                                                                                                                                                                                                                                                     | YES | NO | .....                            |
| 3.                  | Has the government of the country that supervises the project given economic support?                                                                                                                                                                                                                                                                                                                                                                                     | YES | NO | .....<br>.....<br>.....<br>..... |
| 4.                  | If animals, or biomaterials of low and/or lower-middle-income countries are involved, have documents showing compliance with the following normative been submitted to the competent authority:                                                                                                                                                                                                                                                                           |     |    | .....<br>.....<br>.....<br>..... |
|                     | a) Nagoya Protocol on access and benefit-sharing?                                                                                                                                                                                                                                                                                                                                                                                                                         | YES | NO |                                  |
|                     | b) EU Regulation No 511/2014 (on compliance of Nagoya Protocol)?                                                                                                                                                                                                                                                                                                                                                                                                          | YES | NO |                                  |
|                     | <i>Horizon 2020: "Resources from a non-EU country — Any use of local resources (especially animal and/or human tissue samples, genetic material, live animals, human remains, materials of historical value, endangered fauna or flora samples, fossils) must show respect for cultural traditions and share benefits (i.e. also benefit local participants and their communities, involve local workers – as equal partners – and respond to local worker's needs)."</i> |     |    |                                  |
| 5.                  | If the OPU procedure is part of a project which involves low and/or lower-middle-income countries, are benefit-sharing measures been planned?                                                                                                                                                                                                                                                                                                                             | YES | NO | .....<br>.....<br>.....<br>..... |

## OPU Ethical Evaluation Sheet

|     |                                                                                                                                                                                                                                                                                                                                                                                                                                                                                                               |     |    |                                                     |
|-----|---------------------------------------------------------------------------------------------------------------------------------------------------------------------------------------------------------------------------------------------------------------------------------------------------------------------------------------------------------------------------------------------------------------------------------------------------------------------------------------------------------------|-----|----|-----------------------------------------------------|
|     | <p>Please, give details on:</p> <p>a) Benefit sharing measures.</p> <p>b) Responsiveness to local population needs.</p> <p>a) .....</p> <p>.....</p> <p>.....</p> <p>b) .....</p> <p>.....</p> <p>.....</p>                                                                                                                                                                                                                                                                                                   |     |    |                                                     |
| 6.  | <p>If needed, have export licenses, to import biomaterial from non-EU countries into the EU, been obtained?</p> <p><i>Horizon 2020 “Import/export of material — If genetic resources are transferred across borders, it may be mandatory under the law of the provider country to obtain an authorisation for the transfer. In addition, you must use an agreement which describes the conditions for the export and the terms of utilisation and, if applicable, relevant benefit-sharing measures.”</i></p> | YES | NO | <p>.....</p> <p>.....</p> <p>.....</p> <p>.....</p> |
| 7.  | <p>Has CITES authorization from exporting and importing countries for the supply of endangered animal species been obtained?</p>                                                                                                                                                                                                                                                                                                                                                                              | YES | NO | <p>.....</p> <p>.....</p> <p>.....</p> <p>.....</p> |
| 8.  | <p>Has European Endangered Species Programme (EEP) authorization for the use of endangered animal species been obtained?</p>                                                                                                                                                                                                                                                                                                                                                                                  | YES | NO | <p>.....</p> <p>.....</p> <p>.....</p> <p>.....</p> |
| 9.  | <p>Has an ethical approval been obtained?</p>                                                                                                                                                                                                                                                                                                                                                                                                                                                                 | YES | NO | <p>.....</p> <p>.....</p> <p>.....</p> <p>.....</p> |
| 10. | <p>Have the licenses to practice the profession of veterinary medicine of all the veterinarians involved in the procedure been submitted?</p>                                                                                                                                                                                                                                                                                                                                                                 | YES | NO | <p>.....</p> <p>.....</p> <p>.....</p> <p>.....</p> |
| 11. | <p>Have certificates of good standing been submitted?</p> <p><i>(e.g. a certification that no measures of disciplinary action of professional or administrative nature had been taken for all the staff involved in the procedure)</i></p>                                                                                                                                                                                                                                                                    | YES | NO | <p>.....</p> <p>.....</p> <p>.....</p> <p>.....</p> |

## OPU Ethical Evaluation Sheet

| <b>B HARM - BENEFIT EVALUATION</b> |                                                                                                                                                                                                                                                                                                                                                                                                                          |     |    |                                                                                                                                                                                                                                                                                                                                                                 |
|------------------------------------|--------------------------------------------------------------------------------------------------------------------------------------------------------------------------------------------------------------------------------------------------------------------------------------------------------------------------------------------------------------------------------------------------------------------------|-----|----|-----------------------------------------------------------------------------------------------------------------------------------------------------------------------------------------------------------------------------------------------------------------------------------------------------------------------------------------------------------------|
| <b>B1 Benefit evaluation</b>       |                                                                                                                                                                                                                                                                                                                                                                                                                          |     |    |                                                                                                                                                                                                                                                                                                                                                                 |
| <i>Details when needed</i>         |                                                                                                                                                                                                                                                                                                                                                                                                                          |     |    |                                                                                                                                                                                                                                                                                                                                                                 |
| 12.                                | Is the OPU procedure part of a novel conservation strategy?                                                                                                                                                                                                                                                                                                                                                              | YES | NO | <div style="border-bottom: 1px dotted black; height: 1.2em; margin-bottom: 2px;"></div> <div style="border-bottom: 1px dotted black; height: 1.2em; margin-bottom: 2px;"></div> <div style="border-bottom: 1px dotted black; height: 1.2em; margin-bottom: 2px;"></div> <div style="border-bottom: 1px dotted black; height: 1.2em; margin-bottom: 2px;"></div> |
| 13.                                | Will the application of the OPU procedure improve knowledge in developing new conservation strategies?                                                                                                                                                                                                                                                                                                                   | YES | NO | <div style="border-bottom: 1px dotted black; height: 1.2em; margin-bottom: 2px;"></div> <div style="border-bottom: 1px dotted black; height: 1.2em; margin-bottom: 2px;"></div> <div style="border-bottom: 1px dotted black; height: 1.2em; margin-bottom: 2px;"></div> <div style="border-bottom: 1px dotted black; height: 1.2em; margin-bottom: 2px;"></div> |
| 14.                                | Could the effects of the OPU procedure, as part of a novel conservation strategy, have a positive impact on the natural habitat in the future?                                                                                                                                                                                                                                                                           | YES | NO | <div style="border-bottom: 1px dotted black; height: 1.2em; margin-bottom: 2px;"></div> <div style="border-bottom: 1px dotted black; height: 1.2em; margin-bottom: 2px;"></div> <div style="border-bottom: 1px dotted black; height: 1.2em; margin-bottom: 2px;"></div> <div style="border-bottom: 1px dotted black; height: 1.2em; margin-bottom: 2px;"></div> |
| 15.                                | Will the scientific improvements of the OPU procedure impact positively on other scientific fields?                                                                                                                                                                                                                                                                                                                      | YES | NO | <div style="border-bottom: 1px dotted black; height: 1.2em; margin-bottom: 2px;"></div> <div style="border-bottom: 1px dotted black; height: 1.2em; margin-bottom: 2px;"></div> <div style="border-bottom: 1px dotted black; height: 1.2em; margin-bottom: 2px;"></div> <div style="border-bottom: 1px dotted black; height: 1.2em; margin-bottom: 2px;"></div> |
| 16.                                | Will the application of the OPU procedure, as part of a conservation project, produce an economic benefit in the future for local populations?                                                                                                                                                                                                                                                                           | YES | NO | <div style="border-bottom: 1px dotted black; height: 1.2em; margin-bottom: 2px;"></div> <div style="border-bottom: 1px dotted black; height: 1.2em; margin-bottom: 2px;"></div> <div style="border-bottom: 1px dotted black; height: 1.2em; margin-bottom: 2px;"></div> <div style="border-bottom: 1px dotted black; height: 1.2em; margin-bottom: 2px;"></div> |
| 17.                                | Will the application of the OPU procedure improve the professional training of laboratory technicians?<br><br>If yes, please give details<br><br><div style="border-bottom: 1px dotted black; height: 1.2em; margin-bottom: 2px;"></div> <div style="border-bottom: 1px dotted black; height: 1.2em; margin-bottom: 2px;"></div> <div style="border-bottom: 1px dotted black; height: 1.2em; margin-bottom: 2px;"></div> | YES | NO | <div style="border-bottom: 1px dotted black; height: 1.2em; margin-bottom: 2px;"></div> <div style="border-bottom: 1px dotted black; height: 1.2em; margin-bottom: 2px;"></div> <div style="border-bottom: 1px dotted black; height: 1.2em; margin-bottom: 2px;"></div> <div style="border-bottom: 1px dotted black; height: 1.2em; margin-bottom: 2px;"></div> |
| 18.                                | Will the application of the OPU procedure have a capacity building component?                                                                                                                                                                                                                                                                                                                                            | YES | NO | <div style="border-bottom: 1px dotted black; height: 1.2em; margin-bottom: 2px;"></div> <div style="border-bottom: 1px dotted black; height: 1.2em; margin-bottom: 2px;"></div> <div style="border-bottom: 1px dotted black; height: 1.2em; margin-bottom: 2px;"></div> <div style="border-bottom: 1px dotted black; height: 1.2em; margin-bottom: 2px;"></div> |

## OPU Ethical Evaluation Sheet

|     |                                                                                                                                                                                                                                                                                                     |     |    |                                  |
|-----|-----------------------------------------------------------------------------------------------------------------------------------------------------------------------------------------------------------------------------------------------------------------------------------------------------|-----|----|----------------------------------|
| 19. | <p>Literature says infertility is a widespread phenomenon in managed wildlife. Is it that true for the following populations:</p> <p>a) Captive population of southern white rhinos?</p> <p>b) Wild population of southern white rhinos?</p> <p>c) Captive population of northern white rhinos?</p> |     |    | .....                            |
|     |                                                                                                                                                                                                                                                                                                     | YES | NO | .....                            |
|     |                                                                                                                                                                                                                                                                                                     | YES | NO | .....                            |
|     |                                                                                                                                                                                                                                                                                                     | YES | NO | .....                            |
| 20. | <p>Will the health of the animals of this or other related species benefit from the scientific/technological improvements that might be obtained?</p>                                                                                                                                               | YES | NO | .....<br>.....<br>.....<br>..... |
| 21. | <p>Could the OPU procedure or part of it have positive side effects on the animal under the procedure?</p> <p>If yes, which ones?</p> <p>.....</p> <p>.....</p> <p>.....</p>                                                                                                                        | YES | NO | .....<br>.....<br>.....<br>..... |
| 22. | <p>Could the OPU procedure or part of it have positive side effects on the species?</p> <p>If yes, which ones?</p> <p>.....</p> <p>.....</p> <p>.....</p>                                                                                                                                           | YES | NO | .....<br>.....<br>.....<br>..... |
| 23. | <p>Is the scientific knowledge achievable from the OPU procedure optimization/application relevant to the assisted reproductive technology (ART) for mammals?</p>                                                                                                                                   | YES | NO | .....<br>.....<br>.....<br>..... |

## OPU Ethical Evaluation Sheet

| <b>B2 Harm evaluation</b>  |                                                                                                                                                                                                                                                                                                                                                                                                                                                                                                                                                                                               |     |    |                                                     |
|----------------------------|-----------------------------------------------------------------------------------------------------------------------------------------------------------------------------------------------------------------------------------------------------------------------------------------------------------------------------------------------------------------------------------------------------------------------------------------------------------------------------------------------------------------------------------------------------------------------------------------------|-----|----|-----------------------------------------------------|
| <i>Details when needed</i> |                                                                                                                                                                                                                                                                                                                                                                                                                                                                                                                                                                                               |     |    |                                                     |
| 24.                        | <p>Could the OPU procedure, or part of it, have any adverse side effects on the animal/s under procedure?</p> <p>If yes, which ones?</p> <p>.....</p> <p>.....</p> <p>.....</p>                                                                                                                                                                                                                                                                                                                                                                                                               | YES | NO | <p>.....</p> <p>.....</p> <p>.....</p> <p>.....</p> |
| 25.                        | <p>Could the OPU procedure, or part of it, have any adverse side effects on the species?</p> <p>If yes, which ones?</p> <p>.....</p> <p>.....</p> <p>.....</p>                                                                                                                                                                                                                                                                                                                                                                                                                                | YES | NO | <p>.....</p> <p>.....</p> <p>.....</p> <p>.....</p> |
| 26.                        | <p>Has a plan for the mitigation of the adverse effects that the animals might experience, during the following a) and b) steps, been set up?</p> <p style="margin-left: 40px;">a) Anesthetic protocol (safe immobilization or sedation, anesthesia, recovery)</p> <p style="margin-left: 40px;">b) OPU</p> <p>If yes, give details</p> <p style="margin-left: 40px;">a) .....</p> <p style="margin-left: 40px;">.....</p> <p style="margin-left: 40px;">.....</p> <p style="margin-left: 40px;">b) .....</p> <p style="margin-left: 40px;">.....</p> <p style="margin-left: 40px;">.....</p> | YES | NO | <p>.....</p> <p>.....</p> <p>.....</p> <p>.....</p> |
| 27.                        | <p>Have possible adverse effects of the specimens transport been adequately considered?</p>                                                                                                                                                                                                                                                                                                                                                                                                                                                                                                   | YES | NO | <p>.....</p> <p>.....</p> <p>.....</p> <p>.....</p> |

## OPU Ethical Evaluation Sheet

|     |                                                                                                                                                                                              |     |    |                                           |
|-----|----------------------------------------------------------------------------------------------------------------------------------------------------------------------------------------------|-----|----|-------------------------------------------|
| 28. | In case of adverse effects during the oocytes transport, has a mitigation plan been set up?                                                                                                  | YES | NO | .....<br>.....<br>.....<br>.....<br>..... |
| 29. | Has a plan for the mitigation of the adverse effects that the animal might experience after the OPU procedure phases been prepared?<br><br>If yes, give details<br>.....<br>.....<br>.....   | YES | NO | .....<br>.....<br>.....<br>.....<br>..... |
| 30. | In case of critical situations during the OPU procedure, have the possible negative effects (public or scientific opinions, etc.) been considered and discussed within the project partners? | YES | NO | .....<br>.....<br>.....<br>.....<br>..... |
| 31. | Is there any other concern about the harm evaluation of the procedure you would like to underline?<br><br>If yes, give details<br>.....<br>.....<br>.....                                    | YES | NO | .....<br>.....<br>.....<br>.....<br>..... |

## OPU Ethical Evaluation Sheet

| <b>C</b> <b>PROCEDURE QUALITY EVALUATION</b>  |                                                                                                                                                                                                                 |     |    |                                  |
|-----------------------------------------------|-----------------------------------------------------------------------------------------------------------------------------------------------------------------------------------------------------------------|-----|----|----------------------------------|
| <b>C1</b> <b>Pre-screening considerations</b> |                                                                                                                                                                                                                 |     |    |                                  |
| <i>Details when needed</i>                    |                                                                                                                                                                                                                 |     |    |                                  |
| 32.                                           | Has the equipment for the OPU procedure phases been already tested on animals in other related studies?<br><br>If yes, give details<br>.....<br>.....<br>.....                                                  | YES | NO | .....<br>.....<br>.....<br>..... |
| 33.                                           | Since OPU procedure is commonly used in farm and domestic animals, has the necessary species-specific adjustments being considered?                                                                             | YES | NO | .....<br>.....<br>.....<br>..... |
| 34.                                           | Has the opportunity to modify any step of the standard ART protocol - used in farm and domestic animals - ever been considered to improve the procedure?<br><br>If yes, give details<br>.....<br>.....<br>..... | YES | NO | .....<br>.....<br>.....<br>..... |
| 35.                                           | Has a procedural timetable for each single phase of the procedure been drawn up?                                                                                                                                | YES | NO | .....<br>.....<br>.....<br>..... |
| 36.                                           | Are project partners committed to eventually publishing also critical events so that they could be avoided in future projects?<br><br>If no, explain why<br>.....<br>.....<br>.....                             | YES | NO | .....<br>.....<br>.....<br>..... |
| 37.                                           | Has it been planned to share and publish relevant data about the application of procedures refinement?<br><br>If no, explain why.<br>.....<br>.....<br>.....                                                    | YES | NO | .....<br>.....<br>.....<br>..... |

## OPU Ethical Evaluation Sheet

| C2 Procedural steps evaluation |                                                                                                                                                                                                                                                                              |     |    |                                                     |
|--------------------------------|------------------------------------------------------------------------------------------------------------------------------------------------------------------------------------------------------------------------------------------------------------------------------|-----|----|-----------------------------------------------------|
| Details when needed            |                                                                                                                                                                                                                                                                              |     |    |                                                     |
| 38.                            | <p>Has the anaesthetic protocol been tested and evaluated in any other related species?</p> <p>If yes, give details on the possible side effects:</p> <p>.....</p> <p>.....</p> <p>.....</p>                                                                                 | YES | NO | <p>.....</p> <p>.....</p> <p>.....</p> <p>.....</p> |
| 39.                            | <p>Has the OPU procedure been tested and evaluated in any other related species?</p> <p>If yes, give details on the possible side effects:</p> <p>.....</p> <p>.....</p> <p>.....</p>                                                                                        | YES | NO | <p>.....</p> <p>.....</p> <p>.....</p> <p>.....</p> |
| 40.                            | <p>Since the OPU procedure has been tested and evaluated in other related species, has a variation on the ovum collection efficiency between the northern white rhinoceroses and the southern white rhinoceroses been considered?</p> <p>.....</p> <p>.....</p> <p>.....</p> | YES | NO | <p>.....</p> <p>.....</p> <p>.....</p> <p>.....</p> |
| C3 3Rs evaluation              |                                                                                                                                                                                                                                                                              |     |    |                                                     |
| Replacement                    |                                                                                                                                                                                                                                                                              |     |    |                                                     |
| Details when needed            |                                                                                                                                                                                                                                                                              |     |    |                                                     |
| 41.                            | <p>Do the animals undergo to a physiological and behavioural assessment after performing the OPU procedure?</p> <p>If yes, for how long and who will be in charge of it?</p> <p>.....</p> <p>.....</p> <p>.....</p>                                                          | YES | NO | <p>.....</p> <p>.....</p> <p>.....</p> <p>.....</p> |

## OPU Ethical Evaluation Sheet

|                  |                                                                                                                                                                                                                                                                                                                                                                                                                                                                    |     |    |                                                     |
|------------------|--------------------------------------------------------------------------------------------------------------------------------------------------------------------------------------------------------------------------------------------------------------------------------------------------------------------------------------------------------------------------------------------------------------------------------------------------------------------|-----|----|-----------------------------------------------------|
| 42.              | <p>Have alternative procedural steps or parts of them been considered for the execution of the procedure?</p> <p>If not, why?</p> <p>If yes, explain.</p> <p>.....</p> <p>.....</p> <p>.....</p>                                                                                                                                                                                                                                                                   | YES | NO | <p>.....</p> <p>.....</p> <p>.....</p> <p>.....</p> |
| 43.              | <p>Has the opportunity to change some procedural steps for an incomplete replacement been considered?</p> <p>If yes, give some details.</p> <p>.....</p> <p>.....</p> <p>.....</p> <p><i>(for examples, has it been considered to include steps to amplify the results of the procedure, so that it will be not necessary to repeat it several times. i.e. using more efficient hormone stimulation protocols, steps of cell reproduction in vitro, etc.).</i></p> | YES | NO | <p>.....</p> <p>.....</p> <p>.....</p> <p>.....</p> |
| <b>Reduction</b> |                                                                                                                                                                                                                                                                                                                                                                                                                                                                    |     |    |                                                     |
| 44.              | <p>Has this procedure been optimized and standardized so to reduce to a minimum the number of animals involved?</p>                                                                                                                                                                                                                                                                                                                                                | YES | NO | <p>.....</p> <p>.....</p> <p>.....</p>              |
| 45.              | <p>Has the possibility of reducing animal manipulation time during the procedure been considered?</p> <p>If not, why?</p> <p>.....</p> <p>.....</p> <p>.....</p>                                                                                                                                                                                                                                                                                                   | YES | NO | <p>.....</p> <p>.....</p> <p>.....</p> <p>.....</p> |
| 46.              | <p>Will the specimens of the animals involved in this project be shared with other scientific groups?</p> <p>If yes, give details.</p> <p>If no, give details.</p> <p>.....</p> <p>.....</p> <p>.....</p>                                                                                                                                                                                                                                                          | YES | NO | <p>.....</p> <p>.....</p> <p>.....</p> <p>.....</p> |

## OPU Ethical Evaluation Sheet

|                   |                                                                                                                                                                                                                                                                                                                                                                                                                                                                                                                                                                                                                      |     |    |                                                     |
|-------------------|----------------------------------------------------------------------------------------------------------------------------------------------------------------------------------------------------------------------------------------------------------------------------------------------------------------------------------------------------------------------------------------------------------------------------------------------------------------------------------------------------------------------------------------------------------------------------------------------------------------------|-----|----|-----------------------------------------------------|
| 47.               | <p>Is it necessary to repeat the OPU procedure several times on the same animal or on other related species or subspecies?</p> <p>If yes, please, explain why</p> <p>.....</p> <p>.....</p> <p>.....</p>                                                                                                                                                                                                                                                                                                                                                                                                             | YES | NO | <p>.....</p> <p>.....</p> <p>.....</p> <p>.....</p> |
| 48.               | <p>If the animals that undergo the OPU procedure have been already involved in previous procedures, have the suffering or the distress that the animals could have been experienced during the previous procedures, been evaluated?</p> <p><i>(Art. 16 Directive 2010/63/EU) An animal already used in one or more procedures “ may only be reused in a new procedure provided that the following conditions are met: (a) the actual severity of the previous procedures was ‘mild’ or ‘moderate’; (b) it is demonstrated that the animal’s general state of health and well-being has been fully restored”.</i></p> | YES | NO | <p>.....</p> <p>.....</p> <p>.....</p> <p>.....</p> |
| 49.               | <p>Will it be collected, from the animal under the OPU procedure, as many as possible samples (ova, tissues, etc.) that might be of interest in this project or others in the future?</p>                                                                                                                                                                                                                                                                                                                                                                                                                            | YES | NO | <p>.....</p> <p>.....</p> <p>.....</p> <p>.....</p> |
| <b>Refinement</b> |                                                                                                                                                                                                                                                                                                                                                                                                                                                                                                                                                                                                                      |     |    |                                                     |
| 50.               | <p>Has the OPU procedure ever been used in other wild mammal species, so that most of the risks have already been taken into account, analysed and minimized?</p>                                                                                                                                                                                                                                                                                                                                                                                                                                                    | YES | NO | <p>.....</p> <p>.....</p> <p>.....</p> <p>.....</p> |
| 51.               | <p>Have alternative procedural steps or part of them that might reduce pain, suffering, or distress of the animal involved ever been considered?</p>                                                                                                                                                                                                                                                                                                                                                                                                                                                                 | YES | NO | <p>.....</p> <p>.....</p> <p>.....</p> <p>.....</p> |
| 52.               | <p>Have methods/procedures to reduce or avoid pain, suffering, distress, or lasting harm to animals been planned?</p>                                                                                                                                                                                                                                                                                                                                                                                                                                                                                                | YES | NO | <p>.....</p> <p>.....</p> <p>.....</p> <p>.....</p> |

## OPU Ethical Evaluation Sheet

|     |                                                                                                                                          |     |    |                                  |
|-----|------------------------------------------------------------------------------------------------------------------------------------------|-----|----|----------------------------------|
| 53. | Have the innovative devices developed for the procedure been patented?                                                                   | YES | NO | .....<br>.....<br>.....<br>..... |
| 54. | Has the need to stop the OPU procedure prior to the planned completion schedule been considered?                                         | YES | NO | .....<br>.....<br>.....<br>..... |
| 55. | If an unexpected event occurs when the procedure can not be stopped, have alternative strategies been set up?                            | YES | NO | .....<br>.....<br>.....<br>..... |
| 56. | In emergency case, has a protocol for euthanasia been adequately planned?                                                                | YES | NO | .....<br>.....<br>.....<br>..... |
| 57. | In an emergency case, is someone in charge of euthanasia been identified?                                                                | YES | NO | .....<br>.....<br>.....<br>..... |
| 58. | Has animal training for veterinary manipulation (blood collection, injections, etc.) been planned?                                       | YES | NO | .....<br>.....<br>.....<br>..... |
| 59. | Does the management of the animals remain unchanged during the procedure period?<br><br>If yes, give details.<br>.....<br>.....<br>..... | YES | NO | .....<br>.....<br>.....<br>..... |
| 60. | Has a person been designed to monitor the welfare and care of the animals during the procedure?                                          | YES | NO | .....<br>.....<br>.....<br>..... |

## OPU Ethical Evaluation Sheet

|                                             |                                                                                                                                                                                                                      |     |    |                                                     |
|---------------------------------------------|----------------------------------------------------------------------------------------------------------------------------------------------------------------------------------------------------------------------|-----|----|-----------------------------------------------------|
| 61.                                         | <p>Will the animal wellbeing be monitored and assessed throughout all the OPU procedure period (before, during and after the procedure)?</p> <p>If yes, explain how this will be done.</p> <p>.....</p> <p>.....</p> | YES | NO | <p>.....</p> <p>.....</p> <p>.....</p> <p>.....</p> |
| 62.                                         | <p>To avoid animal stress during the procedure, have the external variables (open field conditions, temperature, humidity, ventilation, lighting, and sound) been considered?</p>                                    | YES | NO | <p>.....</p> <p>.....</p> <p>.....</p> <p>.....</p> |
| 63.                                         | <p>Are all the animals involved familiar with the area where the procedure will be carried out?</p>                                                                                                                  | YES | NO | <p>.....</p> <p>.....</p> <p>.....</p> <p>.....</p> |
| <b>D SCIENTIFIC TEAM QUALITY EVALUATION</b> |                                                                                                                                                                                                                      |     |    |                                                     |
| <b>D1 Team and Teamwork</b>                 |                                                                                                                                                                                                                      |     |    |                                                     |
| <i>Details when needed</i>                  |                                                                                                                                                                                                                      |     |    |                                                     |
| 64.                                         | <p>In case of necessity, are the team's economic resources adequate for the procedure completion and to overcome problematic situations or emergencies?</p>                                                          | YES | NO | <p>.....</p> <p>.....</p> <p>.....</p>              |
| 65.                                         | <p>Are all the members of the veterinary team and all the other staff members involved in the OPU procedure experienced in this kind of procedures?</p>                                                              | YES | NO | <p>.....</p> <p>.....</p> <p>.....</p> <p>.....</p> |
| 66.                                         | <p>Are all the members of the veterinary team and all the other staff members involved in the OPU procedure continuously trained for this kind of procedure?</p>                                                     | YES | NO | <p>.....</p> <p>.....</p> <p>.....</p> <p>.....</p> |
| 67.                                         | <p>Are all the members of the veterinary team and all the other staff members involved in the OPU procedure trained to work with this kind of animals?</p>                                                           | YES | NO | <p>.....</p> <p>.....</p> <p>.....</p> <p>.....</p> |
| 68.                                         | <p>Has the team already taken part in relevant and innovative reproductive procedures?</p>                                                                                                                           | YES | NO | <p>.....</p> <p>.....</p> <p>.....</p> <p>.....</p> |

## OPU Ethical Evaluation Sheet

|     |                                                                                                                                                                                      |     |    |                                  |
|-----|--------------------------------------------------------------------------------------------------------------------------------------------------------------------------------------|-----|----|----------------------------------|
| 69. | Has the team already developed innovative methodologies?                                                                                                                             | YES | NO | .....<br>.....<br>.....<br>..... |
| 70. | Is someone deciding the team members of the OPU procedure?<br><br>If yes, give details.<br>.....<br>.....<br>.....                                                                   | YES | NO | .....<br>.....<br>.....<br>..... |
| 71. | Do all the staff members have defined roles and clear responsibilities in the OPU procedure phases?                                                                                  | YES | NO | .....<br>.....<br>.....<br>..... |
| 72. | Have actions to mitigate the possible risks for the staff involved during the OPU procedure been considered?<br><br>If yes, which one?<br>.....<br>.....<br>.....                    | YES | NO | .....<br>.....<br>.....<br>..... |
| 73. | Is the staff able to recognize any sign of psycho/physical discomfort of the animals involved in the procedure and trained to deal with it?                                          | YES | NO | .....<br>.....<br>.....<br>..... |
| 74. | Is someone in charge of the transport of ova from where OPU procedure takes place to the assigned BioBank?<br><br>If yes, how has he/she been identified?<br>.....<br>.....<br>..... | YES | NO | .....<br>.....<br>.....<br>..... |
| 75. | Is there a project manager responsible for the OPU procedure, who supervises and coordinates all the procedural phases?                                                              | YES | NO | .....<br>.....<br>.....<br>..... |

## OPU Ethical Evaluation Sheet

|                                     |                                                                                                                                                                                                                             |     |    |                                                                                                                                                                                                                                                                                                                                                                                                                                                    |
|-------------------------------------|-----------------------------------------------------------------------------------------------------------------------------------------------------------------------------------------------------------------------------|-----|----|----------------------------------------------------------------------------------------------------------------------------------------------------------------------------------------------------------------------------------------------------------------------------------------------------------------------------------------------------------------------------------------------------------------------------------------------------|
| 76.                                 | Has a person responsible for the stocking of NWR biological material in the BioBank been assigned?                                                                                                                          | YES | NO | <div style="border-bottom: 1px dotted black; height: 15px; margin-bottom: 2px;"></div> <div style="border-bottom: 1px dotted black; height: 15px; margin-bottom: 2px;"></div> <div style="border-bottom: 1px dotted black; height: 15px; margin-bottom: 2px;"></div> <div style="border-bottom: 1px dotted black; height: 15px; margin-bottom: 2px;"></div> <div style="border-bottom: 1px dotted black; height: 15px; margin-bottom: 2px;"></div> |
| <b>D2 Equipment</b>                 |                                                                                                                                                                                                                             |     |    |                                                                                                                                                                                                                                                                                                                                                                                                                                                    |
| <i>Details when needed</i>          |                                                                                                                                                                                                                             |     |    |                                                                                                                                                                                                                                                                                                                                                                                                                                                    |
| 77.                                 | Is the adequate equipment, necessary for the proper conduction of all the OPU procedure phases, available? (including instruments for general and specific physical examination and diagnostic kits for specific procedure) | YES | NO | <div style="border-bottom: 1px dotted black; height: 15px; margin-bottom: 2px;"></div> <div style="border-bottom: 1px dotted black; height: 15px; margin-bottom: 2px;"></div> <div style="border-bottom: 1px dotted black; height: 15px; margin-bottom: 2px;"></div> <div style="border-bottom: 1px dotted black; height: 15px; margin-bottom: 2px;"></div> <div style="border-bottom: 1px dotted black; height: 15px; margin-bottom: 2px;"></div> |
| 78.                                 | Is the equipment adequate for the species under the OPU procedure?                                                                                                                                                          | YES | NO | <div style="border-bottom: 1px dotted black; height: 15px; margin-bottom: 2px;"></div> <div style="border-bottom: 1px dotted black; height: 15px; margin-bottom: 2px;"></div> <div style="border-bottom: 1px dotted black; height: 15px; margin-bottom: 2px;"></div> <div style="border-bottom: 1px dotted black; height: 15px; margin-bottom: 2px;"></div> <div style="border-bottom: 1px dotted black; height: 15px; margin-bottom: 2px;"></div> |
| 79.                                 | Has the equipment for correct conduction of the OPU procedure and administration of the treatments been evaluated safe for animal use?                                                                                      | YES | NO | <div style="border-bottom: 1px dotted black; height: 15px; margin-bottom: 2px;"></div> <div style="border-bottom: 1px dotted black; height: 15px; margin-bottom: 2px;"></div> <div style="border-bottom: 1px dotted black; height: 15px; margin-bottom: 2px;"></div> <div style="border-bottom: 1px dotted black; height: 15px; margin-bottom: 2px;"></div> <div style="border-bottom: 1px dotted black; height: 15px; margin-bottom: 2px;"></div> |
| 80.                                 | Before starting the OPU procedure, is the availability of personal protective equipment (PPE) for all the staff members involved checked?                                                                                   | YES | NO | <div style="border-bottom: 1px dotted black; height: 15px; margin-bottom: 2px;"></div> <div style="border-bottom: 1px dotted black; height: 15px; margin-bottom: 2px;"></div> <div style="border-bottom: 1px dotted black; height: 15px; margin-bottom: 2px;"></div> <div style="border-bottom: 1px dotted black; height: 15px; margin-bottom: 2px;"></div> <div style="border-bottom: 1px dotted black; height: 15px; margin-bottom: 2px;"></div> |
| 81.                                 | Has a control checklist been developed to verify if all the equipment needed for the procedure are available, correctly operating and sterilized?                                                                           | YES | NO | <div style="border-bottom: 1px dotted black; height: 15px; margin-bottom: 2px;"></div> <div style="border-bottom: 1px dotted black; height: 15px; margin-bottom: 2px;"></div> <div style="border-bottom: 1px dotted black; height: 15px; margin-bottom: 2px;"></div> <div style="border-bottom: 1px dotted black; height: 15px; margin-bottom: 2px;"></div> <div style="border-bottom: 1px dotted black; height: 15px; margin-bottom: 2px;"></div> |
| <b>D3 Laboratories and BioBanks</b> |                                                                                                                                                                                                                             |     |    |                                                                                                                                                                                                                                                                                                                                                                                                                                                    |
| <i>Details when needed</i>          |                                                                                                                                                                                                                             |     |    |                                                                                                                                                                                                                                                                                                                                                                                                                                                    |
| 82.                                 | Has a standardized protocol for the specimens processing been developed for the BioBank?                                                                                                                                    | YES | NO | <div style="border-bottom: 1px dotted black; height: 15px; margin-bottom: 2px;"></div> <div style="border-bottom: 1px dotted black; height: 15px; margin-bottom: 2px;"></div> <div style="border-bottom: 1px dotted black; height: 15px; margin-bottom: 2px;"></div> <div style="border-bottom: 1px dotted black; height: 15px; margin-bottom: 2px;"></div> <div style="border-bottom: 1px dotted black; height: 15px; margin-bottom: 2px;"></div> |
| 83.                                 | If possible, are the specimens divided into aliquots and stored in more than one laboratory?                                                                                                                                | YES | NO | <div style="border-bottom: 1px dotted black; height: 15px; margin-bottom: 2px;"></div> <div style="border-bottom: 1px dotted black; height: 15px; margin-bottom: 2px;"></div> <div style="border-bottom: 1px dotted black; height: 15px; margin-bottom: 2px;"></div> <div style="border-bottom: 1px dotted black; height: 15px; margin-bottom: 2px;"></div> <div style="border-bottom: 1px dotted black; height: 15px; margin-bottom: 2px;"></div> |

## OPU Ethical Evaluation Sheet

| <b>E ETHICAL EVALUATION OF THE PROCEDURE</b> |                                                                                                                                                                 |     |    |                                                                                                                                                                                                                                                                                                                                             |      |
|----------------------------------------------|-----------------------------------------------------------------------------------------------------------------------------------------------------------------|-----|----|---------------------------------------------------------------------------------------------------------------------------------------------------------------------------------------------------------------------------------------------------------------------------------------------------------------------------------------------|------|
| <i>Details when needed</i>                   |                                                                                                                                                                 |     |    |                                                                                                                                                                                                                                                                                                                                             |      |
| 84.                                          | Has an OPU Ethical Risk Assessment been planned for each application of the procedure?                                                                          | YES | NO | <div style="border-bottom: 1px dotted black; height: 1.2em; margin-bottom: 2px;"></div> <div style="border-bottom: 1px dotted black; height: 1.2em; margin-bottom: 2px;"></div> <div style="border-bottom: 1px dotted black; height: 1.2em; margin-bottom: 2px;"></div> <div style="border-bottom: 1px dotted black; height: 1.2em;"></div> |      |
| 85.                                          | For each OPU procedure's application, will the checklist be filled by:<br><br>IZW team's member<br><br>Local veterinarian<br><br>Managing Director<br><br>Other | YES | NO | <div style="border-bottom: 1px dotted black; height: 1.2em; margin-bottom: 2px;"></div> <div style="border-bottom: 1px dotted black; height: 1.2em; margin-bottom: 2px;"></div> <div style="border-bottom: 1px dotted black; height: 1.2em; margin-bottom: 2px;"></div> <div style="border-bottom: 1px dotted black; height: 1.2em;"></div> |      |
| 86.                                          | In case of disagreement regarding answers to a specific item, is it planned to discuss the options in order to find an agreement among the team members?        | YES | NO | <div style="border-bottom: 1px dotted black; height: 1.2em; margin-bottom: 2px;"></div> <div style="border-bottom: 1px dotted black; height: 1.2em; margin-bottom: 2px;"></div> <div style="border-bottom: 1px dotted black; height: 1.2em; margin-bottom: 2px;"></div> <div style="border-bottom: 1px dotted black; height: 1.2em;"></div> |      |
| 87.                                          | In the case of a non-satisfied requirement that could be underlined by the Ethical Risk Assessment, will risk mitigation actions be implemented?                | YES | NO | <div style="border-bottom: 1px dotted black; height: 1.2em; margin-bottom: 2px;"></div> <div style="border-bottom: 1px dotted black; height: 1.2em; margin-bottom: 2px;"></div> <div style="border-bottom: 1px dotted black; height: 1.2em; margin-bottom: 2px;"></div> <div style="border-bottom: 1px dotted black; height: 1.2em;"></div> |      |
| 88.                                          | Does the procedure accomplish with all the International and National Regulations?                                                                              | YES | NO | <div style="border-bottom: 1px dotted black; height: 1.2em; margin-bottom: 2px;"></div> <div style="border-bottom: 1px dotted black; height: 1.2em; margin-bottom: 2px;"></div> <div style="border-bottom: 1px dotted black; height: 1.2em; margin-bottom: 2px;"></div> <div style="border-bottom: 1px dotted black; height: 1.2em;"></div> |      |
| 89.                                          | Has the staff safety been adequately evaluated with dedicated items of the OPU Ethical Risk Assessment?                                                         | YES | NO | <div style="border-bottom: 1px dotted black; height: 1.2em; margin-bottom: 2px;"></div> <div style="border-bottom: 1px dotted black; height: 1.2em; margin-bottom: 2px;"></div> <div style="border-bottom: 1px dotted black; height: 1.2em; margin-bottom: 2px;"></div> <div style="border-bottom: 1px dotted black; height: 1.2em;"></div> |      |
| 90.                                          | Benefits deriving from the procedure application are:                                                                                                           | Low |    | Medium                                                                                                                                                                                                                                                                                                                                      | High |
| 91.                                          | The possibility of the procedure's successful accomplishment is:                                                                                                | Low |    | Medium                                                                                                                                                                                                                                                                                                                                      | High |

## OPU Ethical Evaluation Sheet

|     |                                                                              |     |    |                                           |      |
|-----|------------------------------------------------------------------------------|-----|----|-------------------------------------------|------|
| 92. | The possibility of the procedure's achievement in the scheduled planning is: | Low |    | Medium                                    | High |
| 93. | The application of the 3Rs principles in the procedure is:                   | Low |    | Medium                                    | High |
| 94. | Is it possible to improve the 3Rs application?                               | YES | NO | .....<br>.....<br>.....<br>.....<br>..... |      |

## OPU Ethical Evaluation Sheet

| FINAL ETHICAL ASSESSMENT OF OPU PROCEDURE                                                                                                                                                                                                                                                                                                                       |            |                         |                   |
|-----------------------------------------------------------------------------------------------------------------------------------------------------------------------------------------------------------------------------------------------------------------------------------------------------------------------------------------------------------------|------------|-------------------------|-------------------|
| The final assessment of section A, "DOCUMENTS", is:<br><br>_____/ 13                                                                                                                                                                                                                                                                                            | Acceptable | Partially<br>Acceptable | Not<br>Acceptable |
| The final assessment of section B, "HARM BENEFIT EVALUATION", is:<br><br>_____/ 22                                                                                                                                                                                                                                                                              | Acceptable | Partially<br>Acceptable | Not<br>Acceptable |
| The final assessment of section C, "PROCEDURE PHASES QUALITY<br>EVALUATION", is:<br><br>_____/ 32                                                                                                                                                                                                                                                               | Acceptable | Partially<br>Acceptable | Not<br>Acceptable |
| The final assessment of section D, "SCIENTIFIC TEAM QUALITY<br>EVALUATION", is:<br><br>_____/ 20                                                                                                                                                                                                                                                                | Acceptable | Partially<br>Acceptable | Not<br>Acceptable |
| The final assessment of section E, "ETHICAL EVALUATION OF OPU<br>PROCEDURE PHASES", is:<br><br>—                                                                                                                                                                                                                                                                | Acceptable | Partially<br>Acceptable | Not<br>Acceptable |
| <b>OVERALL ETHICAL ASSESSMENT OF THE OPU PROCEDURE:</b><br><br><i>If the Ethical Assessment results for each procedure phase respects the predefined cut-off of the OPU procedure is "Acceptable"</i><br><br><i>If the Ethical Assessment results for each procedure phase does not respect the predefined cut-off of the OPU procedure is "Not acceptable"</i> |            |                         |                   |
|                                                                                                                                                                                                                                                                                                                                                                 | Acceptable | Partially<br>Acceptable | Not<br>Acceptable |

## OPU Ethical Evaluation Sheet

Comments,

Ethical *BioRescue* Team

Filled by

Place, Date

Signature
