# Supplementary material for: An Ethical Assessment Tool (ETHAS) to Evaluate the Application of Assisted Reproductive Technologies in Mammals’ Conservation: The Case of the Northern White Rhinoceros (Ceratotherium simum cottoni)
Source: MDPI journal article supplement (doi:10.3390/ani11020312), 2021-01-26
Supplement: s1 [file s1]

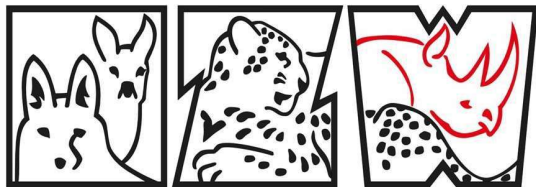

Leibniz Institute for Zoo  
& Wildlife Research Berlin

**BioRescue**

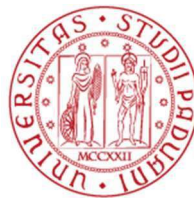

UNIVERSITÀ  
DEGLI STUDI  
DI PADOVA

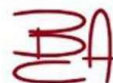

DEPARTMENT OF COMPARATIVE BIOMEDICINE  
AND FOOD SCIENCE

Protocol number \_\_\_\_\_

---

# IVF Laboratory procedures

## **ETHICAL RISK ASSESSMENT**

---

**BioRescue Ethical Team**

Ethics Laboratory for Conservation,  
Veterinary Medicine and Animal Welfare

## ETHICAL RISK ASSESSMENT

The Ethical Risk Assessment (ERA) allows highlighting the critical points or hazards that could occur during the execution of IVF Laboratory (IVF-lab) Procedures compromising their accomplishment. The application of ethical principles in the analysis of the risk, together with a risk ethics approach, provides a deeper analysis of the hazards and allows ethical consideration to be part of risk-related decisions. Therefore, ERA provides a base for the ethical decision-making and allows the assessment of the ethical acceptability of the procedure. For this purpose, the IVF Laboratory Procedures have been divided into different phases (from phase A to phase I - figure 1). Each phase has been analyzed using a detailed checklist built to identify the safety for the specimens and workers and ethical hazards. Each item of the ERA checklist is conceptually linked and mutually integrated into an Ethical Evaluation Sheet - EES (the alpha-numerical code of the first column). EES comprises the relevant ethical aspects that need to be detailed in ERA. In case of potential harms or risks, identified by the failure to reach a minimum threshold on the ERA score, corrective actions will be planned to mitigate the risks for the success of the procedures. The measures for the risk mitigation consist of implementing activities for reaching an acceptable fulfilment of the requirements defined in ERA or to alleviate the adverse effects that might arise. The “as low as reasonably practicable” principle will be applied. This principle expresses that the risk should be reduced to a level that is low as reasonably practicable unless it can be demonstrated that there is a great disproportion between the cost and the benefits.

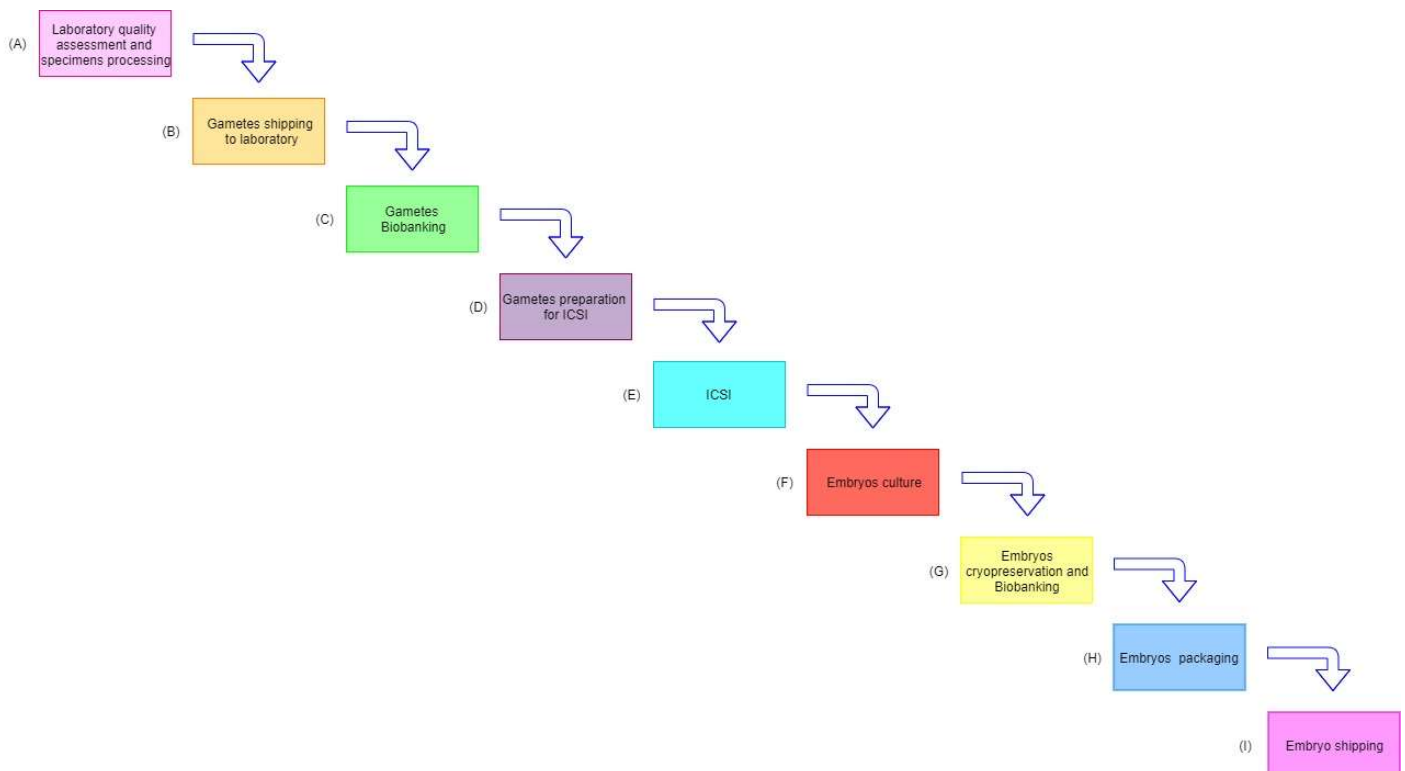

*Figure 1: The flow diagram of the IVF Laboratory Procedures ERA phases. The nine phases (phases A-I) are shown with their relative links.*

## IVF Laboratory Procedures Ethical Risk Assessment

Laboratory \_\_\_\_\_

Date \_\_\_\_\_

Filled by \_\_\_\_\_

### PHASE A LABORATORY QUALITY ASSESSMENT AND SPECIMENS PROCESSING

| EES      | <i>Please answer, marking YES or NO, to the items in your knowledge.<br/>If an item is not relevant to you leave it blank.</i>                                                                                                                                                                                                                    |                                                          |
|----------|---------------------------------------------------------------------------------------------------------------------------------------------------------------------------------------------------------------------------------------------------------------------------------------------------------------------------------------------------|----------------------------------------------------------|
| A        | 1. Does the laboratory have an ISO accreditation?<br><br>If yes, please specify which one<br>.....                                                                                                                                                                                                                                                | <input type="checkbox"/> YES <input type="checkbox"/> NO |
| A        | 2. Does the laboratory have an internal Ethical Committee?                                                                                                                                                                                                                                                                                        | <input type="checkbox"/> YES <input type="checkbox"/> NO |
| D1/<br>A | 3. Has the Director of the laboratory developed a statement or policy that confirms a commitment to risk management, assigning authority, responsibility, and accountability at the appropriate levels within the organization?                                                                                                                   | <input type="checkbox"/> YES <input type="checkbox"/> NO |
| D3       | 4. Is the Risk Management System adequately taken into consideration when the laboratory processes, strategies, and activities are planned?                                                                                                                                                                                                       | <input type="checkbox"/> YES <input type="checkbox"/> NO |
| D1       | 5. Have the necessary resources for risk managing been adequately allocated?                                                                                                                                                                                                                                                                      | <input type="checkbox"/> YES <input type="checkbox"/> NO |
| D1       | 6. Is there a Risk Team in charge of identifying possible risks or adverse events that might occur evaluating them, during periodic meetings, in terms of occurring probability and severity and in charge of supervising the correct execution of the actions planned for mitigating them or, at least, to reduce the risk to a tolerable level? | <input type="checkbox"/> YES <input type="checkbox"/> NO |
| D1/<br>A | 7. Are a), b), and c) present in the laboratory?                                                                                                                                                                                                                                                                                                  |                                                          |
|          | a) Validated written instructions for each process, including management of adverse events                                                                                                                                                                                                                                                        | <input type="checkbox"/> YES <input type="checkbox"/> NO |
|          | b) Warning and accident prevention signs used to minimize work hazards                                                                                                                                                                                                                                                                            | <input type="checkbox"/> YES <input type="checkbox"/> NO |
|          | c) Continuous training for laboratory biosafety and biosecurity practices                                                                                                                                                                                                                                                                         | <input type="checkbox"/> YES <input type="checkbox"/> NO |
| D1       | 8. Are adverse events, or incidents that might occur, rapidly communicated to the risk team?                                                                                                                                                                                                                                                      | <input type="checkbox"/> YES <input type="checkbox"/> NO |
| D1       | 9. Are all the risks and actions to be taken for the risk management rapidly communicated to all the staff clearly, using plain language?                                                                                                                                                                                                         | <input type="checkbox"/> YES <input type="checkbox"/> NO |

## IVF Laboratory Procedures Ethical Risk Assessment

|           |                                                                                                                                                                                                                                                                                                                                                                                                                                                                     |                                                          |
|-----------|---------------------------------------------------------------------------------------------------------------------------------------------------------------------------------------------------------------------------------------------------------------------------------------------------------------------------------------------------------------------------------------------------------------------------------------------------------------------|----------------------------------------------------------|
| D3        | 10. In case of emergencies, due to natural/human causes, has the laboratory developed and implemented plans describing the actions to be taken for the following aspects?<br><br>a) Safety of personnel<br>b) Protection of all fresh and cryopreserved material<br>c) Limitation of damage to equipment and medical records                                                                                                                                        |                                                          |
|           |                                                                                                                                                                                                                                                                                                                                                                                                                                                                     | <input type="checkbox"/> YES <input type="checkbox"/> NO |
|           |                                                                                                                                                                                                                                                                                                                                                                                                                                                                     | <input type="checkbox"/> YES <input type="checkbox"/> NO |
|           |                                                                                                                                                                                                                                                                                                                                                                                                                                                                     | <input type="checkbox"/> YES <input type="checkbox"/> NO |
| D3/<br>A  | 11. Is the access to the place where the biomaterials (biobank building, in the storage room, cryostorage units, <i>etc.</i> ) are stocked appropriately controlled and documented?                                                                                                                                                                                                                                                                                 | <input type="checkbox"/> YES <input type="checkbox"/> NO |
| D3/<br>D2 | 12. Have equipment maintenance schedules, replacement timetables, and calibration (if needed), for ensuring proper and periodic maintenance, been planned?                                                                                                                                                                                                                                                                                                          | <input type="checkbox"/> YES <input type="checkbox"/> NO |
| D2        | 13. Are the following devices adequately monitored and equipped with alarm systems, for detecting any out of range temperature and/or liquid nitrogen low level?<br><br>a) Shipping incubator<br>b) Cryo-storage units                                                                                                                                                                                                                                              |                                                          |
|           |                                                                                                                                                                                                                                                                                                                                                                                                                                                                     | <input type="checkbox"/> YES <input type="checkbox"/> NO |
|           |                                                                                                                                                                                                                                                                                                                                                                                                                                                                     | <input type="checkbox"/> YES <input type="checkbox"/> NO |
| C2        | 14. During the processing of specimens in arrival, are the following aspects been considered?<br><br>a) Unpackaging in biological safety cabinets<br>b) Adequate label and register in a database                                                                                                                                                                                                                                                                   |                                                          |
|           |                                                                                                                                                                                                                                                                                                                                                                                                                                                                     | <input type="checkbox"/> YES <input type="checkbox"/> NO |
|           |                                                                                                                                                                                                                                                                                                                                                                                                                                                                     | <input type="checkbox"/> YES <input type="checkbox"/> NO |
| C2        | 15. Are sanitation and sterilization protocols applied for a), b), and c)?<br><br>a) Equipment<br>b) Personnel<br>c) Laboratories                                                                                                                                                                                                                                                                                                                                   |                                                          |
|           |                                                                                                                                                                                                                                                                                                                                                                                                                                                                     | <input type="checkbox"/> YES <input type="checkbox"/> NO |
|           |                                                                                                                                                                                                                                                                                                                                                                                                                                                                     | <input type="checkbox"/> YES <input type="checkbox"/> NO |
|           |                                                                                                                                                                                                                                                                                                                                                                                                                                                                     | <input type="checkbox"/> YES <input type="checkbox"/> NO |
| D3        | 16. Is there a database that stores all the information related to the following aspects?<br><br>a) Gametes donors<br>b) OPU/semen collection report<br>c) Morphological characteristics of gametes/embryos<br>d) Procedures/manipulation done on the gametes/embryos (including timing and staff involved)<br>e) Documentation/records indicating the results of the embryos testing (including also the data of the embryos that failed to pass the quality test) |                                                          |
|           |                                                                                                                                                                                                                                                                                                                                                                                                                                                                     | <input type="checkbox"/> YES <input type="checkbox"/> NO |
|           |                                                                                                                                                                                                                                                                                                                                                                                                                                                                     | <input type="checkbox"/> YES <input type="checkbox"/> NO |
|           |                                                                                                                                                                                                                                                                                                                                                                                                                                                                     | <input type="checkbox"/> YES <input type="checkbox"/> NO |
|           |                                                                                                                                                                                                                                                                                                                                                                                                                                                                     | <input type="checkbox"/> YES <input type="checkbox"/> NO |
|           |                                                                                                                                                                                                                                                                                                                                                                                                                                                                     | <input type="checkbox"/> YES <input type="checkbox"/> NO |

## IVF Laboratory Procedures Ethical Risk Assessment

|                                               |                                                                                                                                                                                                                                              |                                                                                                                      |
|-----------------------------------------------|----------------------------------------------------------------------------------------------------------------------------------------------------------------------------------------------------------------------------------------------|----------------------------------------------------------------------------------------------------------------------|
| C2                                            | 17. Are the following spermatozoa characteristics evaluated from the biobank before long-term stocking?                                                                                                                                      |                                                                                                                      |
|                                               | a) Concentration                                                                                                                                                                                                                             | <input type="checkbox"/> YES <input type="checkbox"/> NO                                                             |
|                                               | b) Motility                                                                                                                                                                                                                                  | <input type="checkbox"/> YES <input type="checkbox"/> NO                                                             |
|                                               | c) Morphology                                                                                                                                                                                                                                | <input type="checkbox"/> YES <input type="checkbox"/> NO                                                             |
|                                               | d) Acrosome integrity                                                                                                                                                                                                                        | <input type="checkbox"/> YES <input type="checkbox"/> NO                                                             |
| <b>PHASE B GAMETES SHIPPING TO LABORATORY</b> |                                                                                                                                                                                                                                              |                                                                                                                      |
| A                                             | 18. Has a checklist of the documents (certifications, permits, authorization letters) required by the national and international authorities for specimens (semen and/or oocytes) shipping, been drawn up for a) and b)?                     |                                                                                                                      |
|                                               | a) Export<br>b) Import                                                                                                                                                                                                                       | <input type="checkbox"/> YES <input type="checkbox"/> NO<br><input type="checkbox"/> YES <input type="checkbox"/> NO |
| D1                                            | 19. Have the training and certification of the person in charge of gametes (semen and/or oocytes) shipping been assessed?                                                                                                                    | <input type="checkbox"/> YES <input type="checkbox"/> NO                                                             |
| C2                                            | 20. Is there a protocol to be applied in order to respond adequately to emergencies (e.g. temperature variations, such as spills, damages, or theft of materials during transportation and any other realistic and foreseeable emergencies)? | <input type="checkbox"/> YES <input type="checkbox"/> NO                                                             |
| C2/<br>D2                                     | 21. Are the gametes transported into a portable device that can control the adequate temperature chain?                                                                                                                                      | <input type="checkbox"/> YES <input type="checkbox"/> NO                                                             |
| C2                                            | 22. Have methods to assess the specimens package condition before the sending and after the receiving been developed?                                                                                                                        | <input type="checkbox"/> YES <input type="checkbox"/> NO                                                             |
| C2                                            | 23. Is it possible to track the shipment of the embryos in any phase?                                                                                                                                                                        | <input type="checkbox"/> YES <input type="checkbox"/> NO                                                             |
| C2                                            | 24. Are the gametes (sperm/oocytes) preserved from x-ray check control in the airports?                                                                                                                                                      | <input type="checkbox"/> YES <input type="checkbox"/> NO                                                             |
| <b>PHASE C GAMETES BIOBANKING</b>             |                                                                                                                                                                                                                                              |                                                                                                                      |
| C2/<br>A                                      | 25. Are sample handling times documented?                                                                                                                                                                                                    | <input type="checkbox"/> YES <input type="checkbox"/> NO                                                             |
| C2                                            | 26. To avoid misidentification, are the specimens adequately labelled?                                                                                                                                                                       | <input type="checkbox"/> YES <input type="checkbox"/> NO                                                             |
| C2                                            | 27. Before stocking, are the specimens treated for preventing microbial contamination?                                                                                                                                                       | <input type="checkbox"/> YES <input type="checkbox"/> NO                                                             |
| C2                                            | 28. Before stocking are the specimens analysed with quality tests?                                                                                                                                                                           | <input type="checkbox"/> YES <input type="checkbox"/> NO                                                             |

## IVF Laboratory Procedures Ethical Risk Assessment

|                                             |                                                                                                                                                                               |                                                          |
|---------------------------------------------|-------------------------------------------------------------------------------------------------------------------------------------------------------------------------------|----------------------------------------------------------|
| C2/<br>A                                    | 29. Are all the Biobanks involved in the specimens stocking certified?                                                                                                        | <input type="checkbox"/> YES <input type="checkbox"/> NO |
| C3                                          | 30. Are the specimens of the same animal, if possible, separated after the collection and shipped to different Biobanks?                                                      | <input type="checkbox"/> YES <input type="checkbox"/> NO |
| C3                                          | 31. In the Biobank, are the specimens of the same animal, if possible, separated and stored in a) and b)?                                                                     |                                                          |
|                                             | a) Different storage containers                                                                                                                                               | <input type="checkbox"/> YES <input type="checkbox"/> NO |
|                                             | b) Different structures/rooms                                                                                                                                                 | <input type="checkbox"/> YES <input type="checkbox"/> NO |
| <b>PHASE D GAMETES PREPARATION FOR ICSI</b> |                                                                                                                                                                               |                                                          |
| <b>PHASE D1 OOCYTES MATURATION</b>          |                                                                                                                                                                               |                                                          |
| C1                                          | 32. Is the oocytes maturation protocol, based on the present scientific knowledge, the best for this species?                                                                 | <input type="checkbox"/> YES <input type="checkbox"/> NO |
| C1                                          | 33. Is the protocol for oocytes maturation optimized for the species under the procedure?                                                                                     | <input type="checkbox"/> YES <input type="checkbox"/> NO |
| C1                                          | 34. Is the protocol for oocytes maturation optimized on species related to the one under the procedure?                                                                       | <input type="checkbox"/> YES <input type="checkbox"/> NO |
| C1                                          | 35. Is the quality of oocytes, to be used in the procedure, evaluated with a standardized protocol and with an established grade of scoring?                                  | <input type="checkbox"/> YES <input type="checkbox"/> NO |
| C1                                          | 36. Are all the following aspects in oocytes maturation steps optimized for this species?                                                                                     |                                                          |
|                                             | a) pH                                                                                                                                                                         | <input type="checkbox"/> YES <input type="checkbox"/> NO |
|                                             | b) Temperatures                                                                                                                                                               | <input type="checkbox"/> YES <input type="checkbox"/> NO |
|                                             | c) Maturation timing                                                                                                                                                          | <input type="checkbox"/> YES <input type="checkbox"/> NO |
|                                             | d) Mediums                                                                                                                                                                    | <input type="checkbox"/> YES <input type="checkbox"/> NO |
| C3                                          | 37. If oocytes do not reach the metaphase II (stage suitable for ICSI), can they be used for another experiment and/or procedural optimization?                               | <input type="checkbox"/> YES <input type="checkbox"/> NO |
| C2                                          | 38. Is the percentage of oocytes maturation consistent with the percentage of other related animal oocytes maturation reported in the scientific literature?                  | <input type="checkbox"/> YES <input type="checkbox"/> NO |
| <b>PHASE D2 SPERM PREPARATION</b>           |                                                                                                                                                                               |                                                          |
| C1                                          | 39. Has the semen conservation protocol been optimized on species under the procedure?                                                                                        | <input type="checkbox"/> YES <input type="checkbox"/> NO |
| C1                                          | 40. Based on the present scientific knowledge, are the protocols for sperm cryogenic conservation and sperm collection protocol the best for the species under the procedure? | <input type="checkbox"/> YES <input type="checkbox"/> NO |

## IVF Laboratory Procedures Ethical Risk Assessment

|                                                        |                                                                                                                                                                                                                            |                                                          |
|--------------------------------------------------------|----------------------------------------------------------------------------------------------------------------------------------------------------------------------------------------------------------------------------|----------------------------------------------------------|
| C1                                                     | 41. Has the quality of sperm, to be used in the procedure, been evaluated with a standardized protocol and with an established grade of scoring?                                                                           | <input type="checkbox"/> YES <input type="checkbox"/> NO |
| C1                                                     | 42. Is the percentage of sperm recovery consistent with the percentage of other animal sperm recovery, as reported in the scientific literature?                                                                           | <input type="checkbox"/> YES <input type="checkbox"/> NO |
| C3                                                     | 43. For each ICSI procedure, is it possible to thaw the minimum necessary aliquot of semen?                                                                                                                                | <input type="checkbox"/> YES <input type="checkbox"/> NO |
| C3                                                     | 44. Is it possible to use the spermatozoa not used in ICSI for other experiments and/or procedural optimization?                                                                                                           | <input type="checkbox"/> YES <input type="checkbox"/> NO |
| <b>PHASE E INTRACYTOPLASMIC SPERM INJECTION (ICSI)</b> |                                                                                                                                                                                                                            |                                                          |
| C3                                                     | 45. Is the piezo-driven micromanipulator used the best available that can avoid oocyte damage and improve the fertilization rate? (e.g. a piezo-stepper that can control the pressure of the intracytoplasmatic injection) | <input type="checkbox"/> YES <input type="checkbox"/> NO |
| C3                                                     | 46. Is ICSI the best fertilization practice with the highest percentage of egg fertilization success?                                                                                                                      | <input type="checkbox"/> YES <input type="checkbox"/> NO |
| C1                                                     | 47. In order to improve fertilization rate, is the maturation time of the oocytes used optimized?                                                                                                                          | <input type="checkbox"/> YES <input type="checkbox"/> NO |
| C1                                                     | 48. In order to prevent oocyte damage, are all the steps of oocytes manipulation (cumulus cell removal, sperm injection position in the membrane, etc.) optimized?                                                         | <input type="checkbox"/> YES <input type="checkbox"/> NO |
| C1                                                     | 49. In order to prevent oocyte damage, are hyaluronidase concentration and exposure timing optimized to be kept to a minimum to remove cumulus cells from oocytes?                                                         | <input type="checkbox"/> YES <input type="checkbox"/> NO |
| C1                                                     | 50. Is there a technique to improve the low rate of fertilization and cleavage after sperm injection?                                                                                                                      | <input type="checkbox"/> YES <input type="checkbox"/> NO |
| <b>PHASE F EMBRYOS CULTURE</b>                         |                                                                                                                                                                                                                            |                                                          |
| C1                                                     | 51. Is the embryo culture protocol the best available, based on present scientific knowledge, for this species?                                                                                                            | <input type="checkbox"/> YES <input type="checkbox"/> NO |
| C1                                                     | 52. Is the embryo culture protocol optimized on species under the procedure?                                                                                                                                               | <input type="checkbox"/> YES <input type="checkbox"/> NO |
| C1                                                     | 53. Is the embryo culture protocol optimized on species related to the one under the procedure?                                                                                                                            | <input type="checkbox"/> YES <input type="checkbox"/> NO |
| C3                                                     | 54. Is the timing of medium changing optimized for this species?                                                                                                                                                           | <input type="checkbox"/> YES <input type="checkbox"/> NO |
| C1                                                     | 55. Are all the data related to the status of the embryo adequately recorded?                                                                                                                                              | <input type="checkbox"/> YES <input type="checkbox"/> NO |

## IVF Laboratory Procedures Ethical Risk Assessment

|                                                                             |                                                                                                                                                                                                          |                                                          |
|-----------------------------------------------------------------------------|----------------------------------------------------------------------------------------------------------------------------------------------------------------------------------------------------------|----------------------------------------------------------|
| C1/<br>D3                                                                   | 56. Do all the manipulation of the embryos take place in an adequate place (in terms sanitation, cleanliness etc.) with sanitized materials?                                                             | <input type="checkbox"/> YES <input type="checkbox"/> NO |
| C1                                                                          | 57. Is the quality of embryos evaluated, before cryopreservation, with a standardized protocol and with an established grade of embryo scoring?                                                          | <input type="checkbox"/> YES <input type="checkbox"/> NO |
| <b>PHASE G                      EMBRYOS CRYOPRESERVATION AND BIOBANKING</b> |                                                                                                                                                                                                          |                                                          |
| D3                                                                          | 58. Is there a database including the following information?                                                                                                                                             |                                                          |
|                                                                             | a) Cryogenic vial label information (i.d. Number, <i>etc.</i> )                                                                                                                                          | <input type="checkbox"/> YES <input type="checkbox"/> NO |
|                                                                             | b) Cryopreservation method                                                                                                                                                                               | <input type="checkbox"/> YES <input type="checkbox"/> NO |
|                                                                             | c) Date and time of cryopreservation                                                                                                                                                                     | <input type="checkbox"/> YES <input type="checkbox"/> NO |
|                                                                             | d) Operator                                                                                                                                                                                              | <input type="checkbox"/> YES <input type="checkbox"/> NO |
|                                                                             | e) Parents' information                                                                                                                                                                                  | <input type="checkbox"/> YES <input type="checkbox"/> NO |
|                                                                             | f) Embryo quality and stage of development                                                                                                                                                               | <input type="checkbox"/> YES <input type="checkbox"/> NO |
|                                                                             | g) Number of embryos per cryogenic vial                                                                                                                                                                  | <input type="checkbox"/> YES <input type="checkbox"/> NO |
|                                                                             | h) Location (tank, canister) of stored samples in the cryogenic device                                                                                                                                   | <input type="checkbox"/> YES <input type="checkbox"/> NO |
| D3                                                                          | 59. Is there a periodic inventory of the contents of the cryobank, including cross-referencing contents with storage records?                                                                            | <input type="checkbox"/> YES <input type="checkbox"/> NO |
| C3                                                                          | 60. Is the slow freezing protocol used for embryo cryopreservation the best available for the species?                                                                                                   | <input type="checkbox"/> YES <input type="checkbox"/> NO |
| C3                                                                          | 61. Would it be possible to have a higher rate of embryos recovery with the vitrification protocol?                                                                                                      | <input type="checkbox"/> YES <input type="checkbox"/> NO |
| <b>PHASE H                      EMBRYOS PACKAGING</b>                       |                                                                                                                                                                                                          |                                                          |
| A                                                                           | 62. To carry out the process in line with the relevant national and international regulations, has the staff involved in the embryos packaging been adequately assessed regarding the following aspects? |                                                          |
|                                                                             | a) Training                                                                                                                                                                                              | <input type="checkbox"/> YES <input type="checkbox"/> NO |
|                                                                             | b) Certification                                                                                                                                                                                         | <input type="checkbox"/> YES <input type="checkbox"/> NO |
|                                                                             | c) Competence                                                                                                                                                                                            | <input type="checkbox"/> YES <input type="checkbox"/> NO |
| C1                                                                          | 63. Is the embryos packaging adequate in terms of a) and b)?                                                                                                                                             |                                                          |
|                                                                             | a) Temperature control                                                                                                                                                                                   | <input type="checkbox"/> YES <input type="checkbox"/> NO |
|                                                                             | b) Incubator volume limit                                                                                                                                                                                | <input type="checkbox"/> YES <input type="checkbox"/> NO |
| C1                                                                          | 64. Is the marking and labelling for the identification and classification of the packed biological material adequate?                                                                                   | <input type="checkbox"/> YES <input type="checkbox"/> NO |
| C1                                                                          | 65. Have different tools (e.g. checklist, etc) and/or procedure been developed to check the correct packaging?                                                                                           | <input type="checkbox"/> YES <input type="checkbox"/> NO |

## IVF Laboratory Procedures Ethical Risk Assessment

| PHASE I |                                                                                                                                                                                                                                                      |                              | EMBRYOS SHIPPING |                             |  |
|---------|------------------------------------------------------------------------------------------------------------------------------------------------------------------------------------------------------------------------------------------------------|------------------------------|------------------|-----------------------------|--|
| A       | 66. Has a checklist to verify documents (certifications, permits, authorization letters) required by the national and international authorities for specimens (gametes) shipping, been drawn up for the following details?<br>a) Export<br>b) Import |                              |                  |                             |  |
|         |                                                                                                                                                                                                                                                      | <input type="checkbox"/> YES |                  | <input type="checkbox"/> NO |  |
|         |                                                                                                                                                                                                                                                      | <input type="checkbox"/> YES |                  | <input type="checkbox"/> NO |  |
| A       | 67. Have the training and certification of the person in charge of embryo shipping been assessed?                                                                                                                                                    | <input type="checkbox"/> YES |                  | <input type="checkbox"/> NO |  |
| C3      | 68. Is there a protocol to be applied in order to respond adequately to emergencies (e.g. temperature variations, such as spills, damages, or theft of materials during transportation and any other realistic and foreseeable emergencies)?         | <input type="checkbox"/> YES |                  | <input type="checkbox"/> NO |  |
| D2      | 69. Are the embryos transported into a portable device that can control the adequate temperature chain?                                                                                                                                              | <input type="checkbox"/> YES |                  | <input type="checkbox"/> NO |  |
| C1      | 70. Have methods to assess the specimens package condition before the sending and after the receiving been developed?                                                                                                                                | <input type="checkbox"/> YES |                  | <input type="checkbox"/> NO |  |
| C1      | 71. Is it possible to track the shipment of the embryos in any phase?                                                                                                                                                                                | <input type="checkbox"/> YES |                  | <input type="checkbox"/> NO |  |
| C2      | 72. Are the embryos preserved from x-ray check control in the airports?                                                                                                                                                                              | <input type="checkbox"/> YES |                  | <input type="checkbox"/> NO |  |

## IVF Laboratory Procedures Ethical Risk Assessment

Comments,

I hereby give my consent for the processing of data provided on the Ethical Risk Assessment (ERA) form to be stored, processed, analyzed and published by *BioRescue* project partner for scientific research purposes.

Place, Date

Signature
