# Supplementary material for: An Ethical Assessment Tool (ETHAS) to Evaluate the Application of Assisted Reproductive Technologies in Mammals’ Conservation: The Case of the Northern White Rhinoceros (Ceratotherium simum cottoni)
Source: Animals (Basel). 2021 Jan 26;11(2):312. doi: 10.3390/ani11020312 (PMC7911958; doi:10.3390/ani11020312)
Supplement: Supplementary file 1 [file animals-11-00312-s001.zip]

Archive with 4 entries (4 files):
- File S1.pdf
- File S2.pdf
- File S3.pdf
- File S4.pdf
